# Supplementary material for: Structurally novel C17-sesquiterpene lactones from Ainsliaea pertyoides
Source: Royal Society of Chemistry journal article supplement (doi:10.1039/c5ra16551b), 2015-01-01
Supplement: c5ra16551b1.pdf [file c5ra16551b1.pdf]

## Supplementary Information

### Structurally Novel C<sub>17</sub>-Sesquiterpene Lactones from

### *Ainsliaea pertyoides*

Zhi-Ran Shi,<sup>ab</sup> Yun-Heng Shen,<sup>\*b</sup> Xian-Yuan Zhang,<sup>c</sup> Xin Fang,<sup>b</sup> Ren-Tao Zeng,<sup>b</sup>  
Qing-Xin Liu,<sup>ab</sup> Zhi-Guo Zhuo,<sup>b</sup> Feng Feng<sup>\*a</sup> and Wei-Dong Zhang<sup>\*abc</sup>

<sup>a</sup> *Department of Natural Medicinal Chemistry, China Pharmaceutical University, Nanjing 210009, P. R. China*

<sup>b</sup> *Department of Phytochemistry, School of Pharmacy, Second Military Medical University, Shanghai 200433, P. R. China*

<sup>c</sup> *Shanghai Institute of Pharmaceutical Industry, Shanghai 200040, P. R. China*

**\*Correspondence E-mail: [shenyunheng@hotmail.com](mailto:shenyunheng@hotmail.com);**

**[fengsunlight@163.com](mailto:fengsunlight@163.com)**

**[wzhangy@hotmail.com](mailto:wzhangy@hotmail.com)**

# Contents

## Experimental section

**Figure S1.** The structure of compounds **1–18**

**Figure S2.** HR-ESIMS spectrum of Pertyolide A (**1**)

**Figure S3.** IR spectrum of Pertyolide A (**1**)

**Figure S4.** OR Value of Pertyolide A (**1**) in CH<sub>3</sub>OH

**Figure S5.** UV spectrum of Pertyolide A (**1**) in CH<sub>3</sub>OH

**Figure S6.** CD spectrum of Pertyolide A (**1**) in CH<sub>3</sub>OH

**Figure S7.** <sup>1</sup>H- NMR spectrum of Pertyolide A (**1**) in CDCl<sub>3</sub>

**Figure S8.** <sup>13</sup>C and DEPT-135 NMR spectrum of Pertyolide A (**1**) in CDCl<sub>3</sub>

**Figure S9.** <sup>1</sup>H–<sup>1</sup>H COSY spectrum of Pertyolide A (**1**) in CDCl<sub>3</sub>

**Figure S10.** HSQC spectrum of Pertyolide A (**1**) in CDCl<sub>3</sub>

**Figure S11.** HMBC spectrum of Pertyolide A (**1**) in CDCl<sub>3</sub>

**Figure S12.** NOESY spectrum of Pertyolide A (**1**) in CDCl<sub>3</sub>

**Figure S13.** Single X-ray crystal structure and Packing diagram of **1**

Crystallographic data of Pertyolide A (**1**)

**Figure S14.** HR-ESIMS spectrum of Pertyolide B (**2**)

**Figure S15.** IR spectrum of Pertyolide B (**2**)

**Figure S16.** OR Value of Pertyolide B (**2**) in CH<sub>3</sub>OH

**Figure S17.** UV spectrum of Pertyolide B (**2**) in CH<sub>3</sub>OH

**Figure S18.** CD spectrum of Pertyolide B (**2**) in CH<sub>3</sub>OH

**Figure S19.** <sup>1</sup>H- NMR spectrum of Pertyolide B (**2**) in CDCl<sub>3</sub>

**Figure S20.** <sup>13</sup>C and DEPT-135 NMR spectrum of Pertyolide B (**2**) in CDCl<sub>3</sub>

**Figure S21.** <sup>1</sup>H–<sup>1</sup>H COSY spectrum of Pertyolide B (**2**) in CDCl<sub>3</sub>

**Figure S22.** HSQC spectrum of Pertyolide B (**2**) in CDCl<sub>3</sub>

**Figure S23.** HMBC spectrum of Pertyolide B (**2**) in CDCl<sub>3</sub>

**Figure S24.** NOESY spectrum of Pertyolide B (**2**) in CDCl<sub>3</sub>

**Figure S25.** HR-ESIMS spectrum of Pertyolide C (**3**)

**Figure S26.** IR spectrum of Pertyolide C (**3**)

**Figure S27.** OR Value of Pertyolide C (**3**) in CH<sub>3</sub>OH

**Figure S28.** UV spectrum of Pertyolide B (**3**) in CH<sub>3</sub>OH

**Figure S29.** <sup>1</sup>H- NMR spectrum of Pertyolide C (**3**) in CDCl<sub>3</sub>

**Figure S30.** <sup>13</sup>C and DEPT-135 NMR spectrum of Pertyolide C (**3**) in CDCl<sub>3</sub>

**Figure S31.** <sup>1</sup>H-<sup>1</sup>H COSY spectrum of Pertyolide C (**3**) in CDCl<sub>3</sub>

**Figure S32.** HSQC spectrum of Pertyolide C (**3**) in CDCl<sub>3</sub>

**Figure S33.** HMBC spectrum of Pertyolide C (**3**) in CDCl<sub>3</sub>

**Figure S34.** NOESY spectrum of Pertyolide C (**3**) in CDCl<sub>3</sub>

**Figure S35.** The inhibition rate curves

**Table S1–3** Inhibition rate (%) of compounds (**5**, **6**, **Doxorubicin**) against cell lines

## Experimental section

### General Experimental Procedures

**General.** Optical rotations: Autopol VI (serial No. 90079, manufactured by Rudolph Research Analytical, Hackettstown, NJ). IR spectra were recorded on a Bruker Vector 22 spectrometer using KBr disks. UV spectra were recorded with a Varian CARY 50. NMR spectra were obtained using Bruker Ascend-500 spectrometer (500 MHz). The chemical shift ( $\delta$ ) values are given in ppm with TMS as internal standard, and coupling constants ( $J$ ) in Hz. MS were measured with Agilent *MSD-Trap-XCT* (for ESI) and *Q-ToF* micro mass spectrometer (for HR-ESI). Column chromatography (CC): silica gel H (10–40  $\mu\text{m}$ ; *Marine Chemical Factory*, Qingdao, P. R. China); Sephadex LH-20 (*Pharmacia Fine Chemicals*, Piscataway, NJ, USA); RP-C18 gel (40–63  $\mu\text{m}$ ; Daiso, Co., Japan) were used for column chromatography. Preparative TLC (0.4–0.5 mm, 20×20 cm) was conducted with glass precoated silica gel GF254 (*Huiyou Silica Gel Development Co., Ltd.*). Spots were detected on TLC under UV light or by heating after spraying with 10 %  $\text{H}_2\text{SO}_4$  in EtOH and followed by heating.

**Plant Material.** The whole plants of *Ainsliaea pertyoides* was collected in August 2014, from Gongshan county, Yunnan province, China, and authenticated by Prof. Yuanchuan Zhou in the Nujiang Institute of Medicinal Plants. A voucher specimen (no. 2014108014) is deposited in School of Pharmacy, Second Military Medical University.

**Extraction and Isolation.** The air-dried plant material of *A. pertyoides* (10.0 kg) was percolated with 95% EtOH at room temperature, and the extract (0.6 kg) was further partitioned between EtOAc and  $\text{H}_2\text{O}$ . The EtOAc-soluble partition (80 g) was fractionated on a column of macroporous resin eluted with 30, 80, and 100% MeOH/ $\text{H}_2\text{O}$ , and the 80% MeOH elution (60 g) was separated by an MCI gel column (MeOH/ $\text{H}_2\text{O}$ , 4:6 to 9:1) to afford seven fractions (A–G), the fourth fraction (E, 10 g)

of which was subjected to CC eluted with petroleum ether–acetone (100:1 to 1:2) to yield 6 subfractions (E1–E6). Fraction E4 was separated over a column of RP-18 silica gel (MeOH–H<sub>2</sub>O, 5:5 to 9:1) to furnish five fractions (E4a–E4e), and the first fraction (E4a) was purified by semi-preparative HPLC to return compounds 5 (28 mg), 7 (21 mg) and 16 (7 mg). E4b was purified by silica gel CC (CHCl<sub>3</sub>–MeOH, 500:1 to 150:1) and HPLC to yield 12 (3 mg), 13 (19 mg), 15 (9 mg) and 14 (4 mg). Fraction E5 was sequentially fractionated by RP-18 silica gel (MeOH–H<sub>2</sub>O, 5:5 to 4:1) and silica gel (petroleum ether–CHCl<sub>3</sub>, 5:1 to 1:4) CC, and was finally purified by semi-preparative HPLC to afford 1 (12 mg), 2 (15 mg), 3 (49 mg), 4 (33 mg) and 8 (4 mg). Fraction F was extensively separated by columns of RP-18 silica gel (MeOH–H<sub>2</sub>O, 5:5 to 4:1) and silica gel (CHCl<sub>3</sub>–MeOH, 500:1 to 100:1), and was finally purified by HPLC to give 10 (100 mg), 6 (15 mg), 11 (12 mg) and 9 (16 mg). Fraction G was fractionated in sequence by RP-18 silica gel (MeOH/H<sub>2</sub>O, 55% to 70%) CC, silica gel CC (CH<sub>3</sub>Cl/MeOH, 500:1 to 150:1), and finally semi-preparative HPLC to afford compounds 17 (2 mg) and 18 (9 mg).

### **Cytotoxicity Assay**

The cytotoxicity of compound **1** was determined by MTT assay (Sigma, St. Louis, MO). Briefly, A549, HCT116, MGC803 and CCRF-CEM cells were inoculated at a density of  $1 \times 10^4$  cells/well in 96-well microplates and after 24 h incubation were treated with 0.001, 0.01, 0.1, 1, 10 and 100  $\mu$ M of **1**, and doxorubicin for 24, 48 and 72 h. At the end of the incubation, 10  $\mu$ L of MTT (5 mg/mL) was added to each well, and the plates were incubated for 4 h at 37 °C. The supernatants were aspirated carefully and 150  $\mu$ L of DMSO were added to each well to dissolve the precipitate. Absorbance was read at 570 nm by a BioTek Synergy 2 plate reader (BioTek Instruments, Inc., Winooski, Vt, USA). Each experiment was performed in triplicate. Consequently, compounds **2-18** were tested as that of **1**. Results of three independent experiments were used for statistical analysis. IC<sub>50</sub> value was calculated by the Logit method.

**Figure S1.** The structure of compounds **1–18**

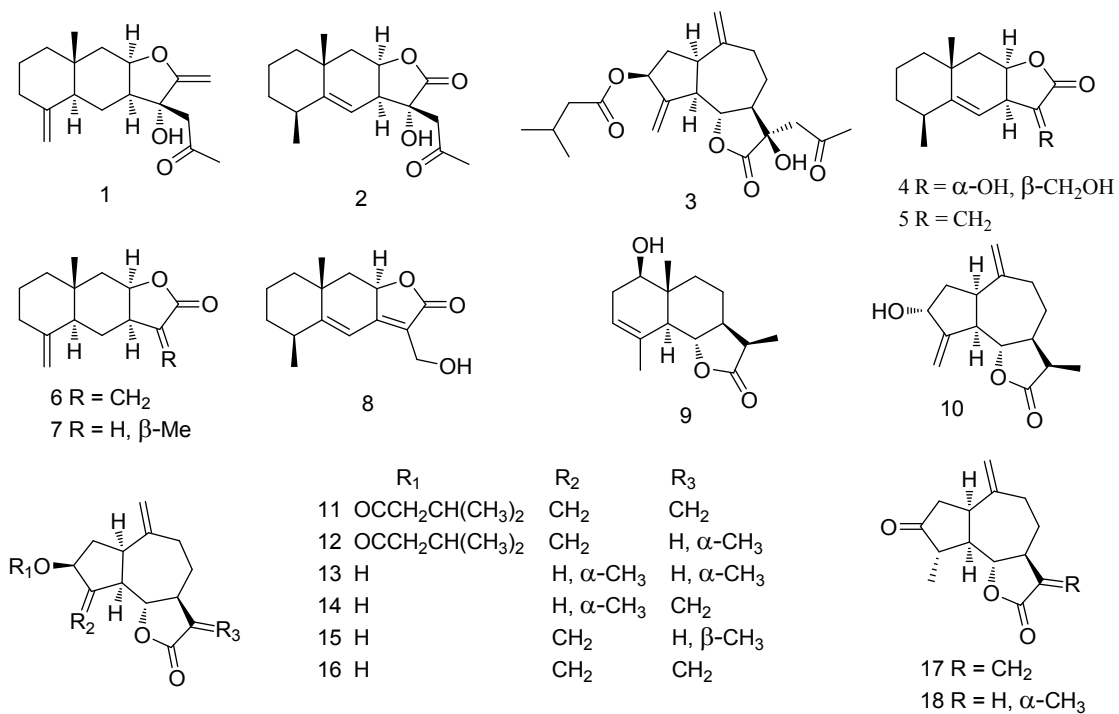

**Figure S2.** HR-ESIMS spectrum of Pertyolide A (1)

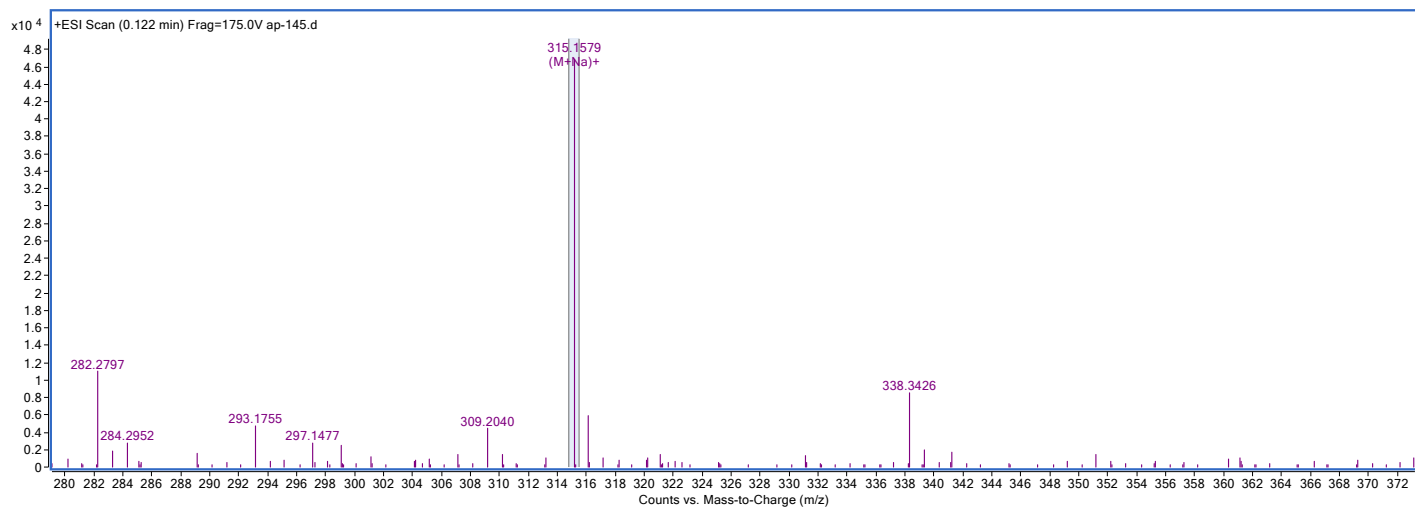

| m/z      | Ion                                            | Formula                                          | Abundance |       |             |          |           |
|----------|------------------------------------------------|--------------------------------------------------|-----------|-------|-------------|----------|-----------|
| 315.1579 | (M+Na) <sup>+</sup>                            | C <sub>17</sub> H <sub>24</sub> NaO <sub>4</sub> | 46876.6   |       |             |          |           |
| Best     | Formula (M)                                    | Ion Formula                                      | Calc m/z  | Score | Cross Score | Mass     | Calc Mass |
| TRUE     | C <sub>17</sub> H <sub>24</sub> O <sub>4</sub> | C <sub>17</sub> H <sub>24</sub> NaO <sub>4</sub> | 315.1567  | 86.39 |             | 292.1686 | 292.1675  |



**Figure S3.** IR spectrum of Pertyolide A (**1**)

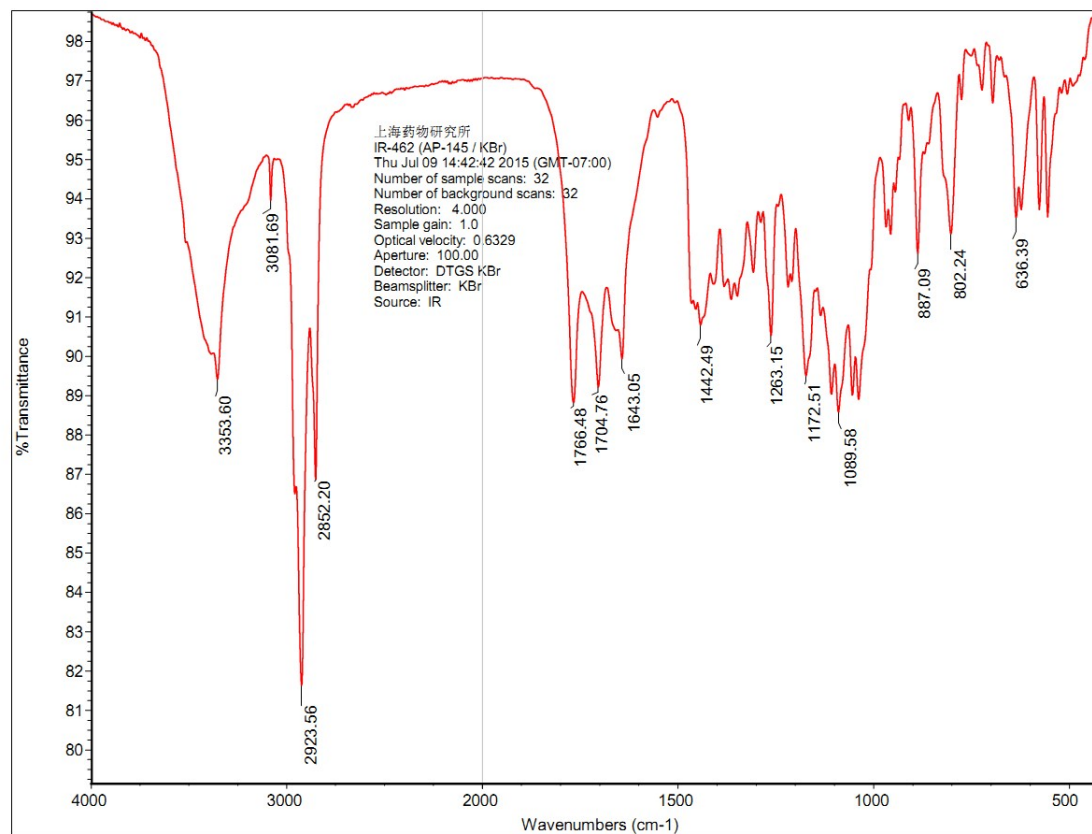

**Figure S4.** OR Value of Pertyolide A (**1**) in CH<sub>3</sub>OH

**Rudolph Research Analytical**

Tuesday, 03/24/2015

This sample was measured on an Autopol VI, serial number 90079, manufactured by Rudolph Research Analytical, Hackettstown, NJ.

LotID : 084/MeOH  
Set Temperature : 20.0  
Temp Corr : OFF

| n    | Average   | Std.Dev.    | Maximum | Minimum |          |     |        |       |       |         |
|------|-----------|-------------|---------|---------|----------|-----|--------|-------|-------|---------|
| 6    | 42.000    | 0.0000      | 42.000  | 42.000  |          |     |        |       |       |         |
| S.No | Sample ID | Time        | Result  | Scale   | OR ° Arc | WLG | Lg.mm  | Conc. | Temp. | Comment |
| 1    | AP-145    | 02:42:49 PM | 42.000  | SR      | 0.042    | 589 | 100.00 | 0.100 | 20.2  |         |
| 2    | AP-145    | 02:42:55 PM | 42.000  | SR      | 0.042    | 589 | 100.00 | 0.100 | 20.2  |         |
| 3    | AP-145    | 02:43:01 PM | 42.000  | SR      | 0.042    | 589 | 100.00 | 0.100 | 20.2  |         |
| 4    | AP-145    | 02:43:07 PM | 42.000  | SR      | 0.042    | 589 | 100.00 | 0.100 | 20.2  |         |
| 5    | AP-145    | 02:43:13 PM | 42.000  | SR      | 0.042    | 589 | 100.00 | 0.100 | 20.2  |         |
| 6    | AP-145    | 02:43:19 PM | 42.000  | SR      | 0.042    | 589 | 100.00 | 0.100 | 20.1  |         |

Signature

**Figure S5.** UV spectrum of Pertyolide A (**1**) in CH<sub>3</sub>OH

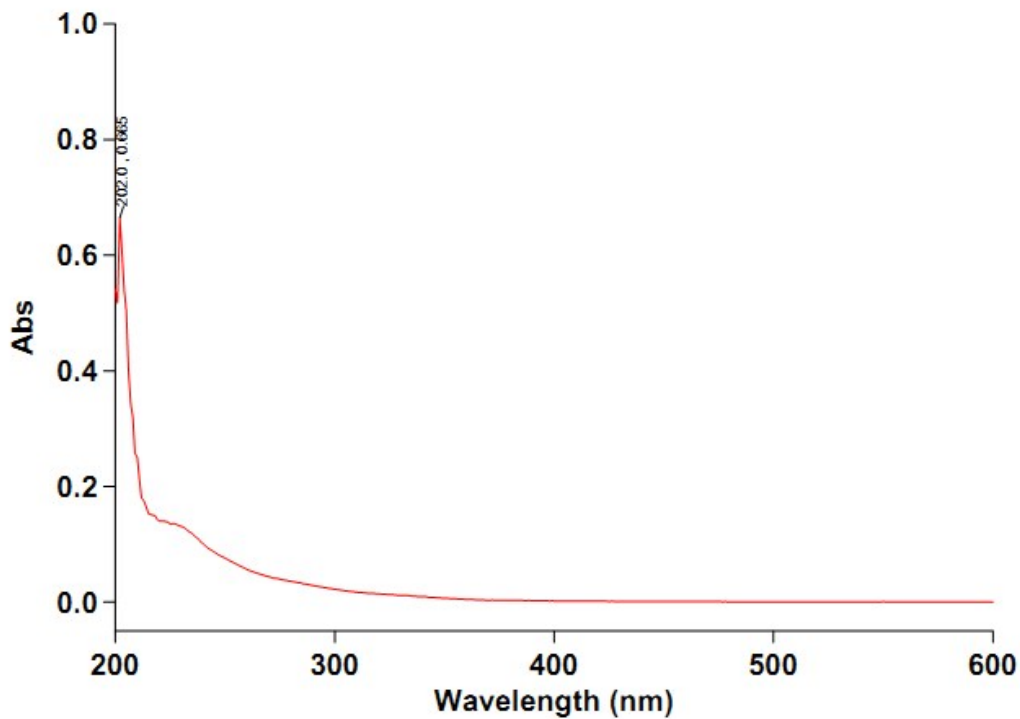

**Figure S6.** CD spectrum of Pertyolide A (**1**) in CH<sub>3</sub>OH

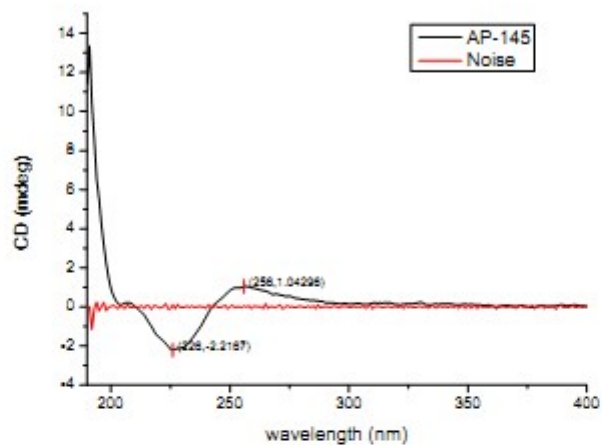

|                            |                            |
|----------------------------|----------------------------|
| Date                       | 2015/3/25                  |
| Instrument                 | Chirascan                  |
| Serial No.                 | CS 30049                   |
| Detector                   | Photomultiplier Tube (PMT) |
| Lamp                       | 150 watt xenon arc         |
| Bandwidth(nm)              | 1.0                        |
| Wavelength range(nm)       | 400 to 190                 |
| Time per step (seconds)    | 0.5                        |
| Wavelength step (nm)       | 1.0                        |
| Cell pathlength(mm)        | 0.5                        |
| Concentration (mg/mL)      | 0.5                        |
| Data manipulation          | MeOH subtraction           |
| Temperature (°C)           | Room temperature           |
| Number of spectra averaged | Sample 3                   |
| Smoothing                  | 3 point Savitsky-Golay     |
| Sample Name                | AP-145                     |
| Operator                   | Lin                        |
| Comment                    |                            |

Signature

Figure S7. <sup>1</sup>H- NMR spectrum of Pertyolide A (1) in CDCl<sub>3</sub>

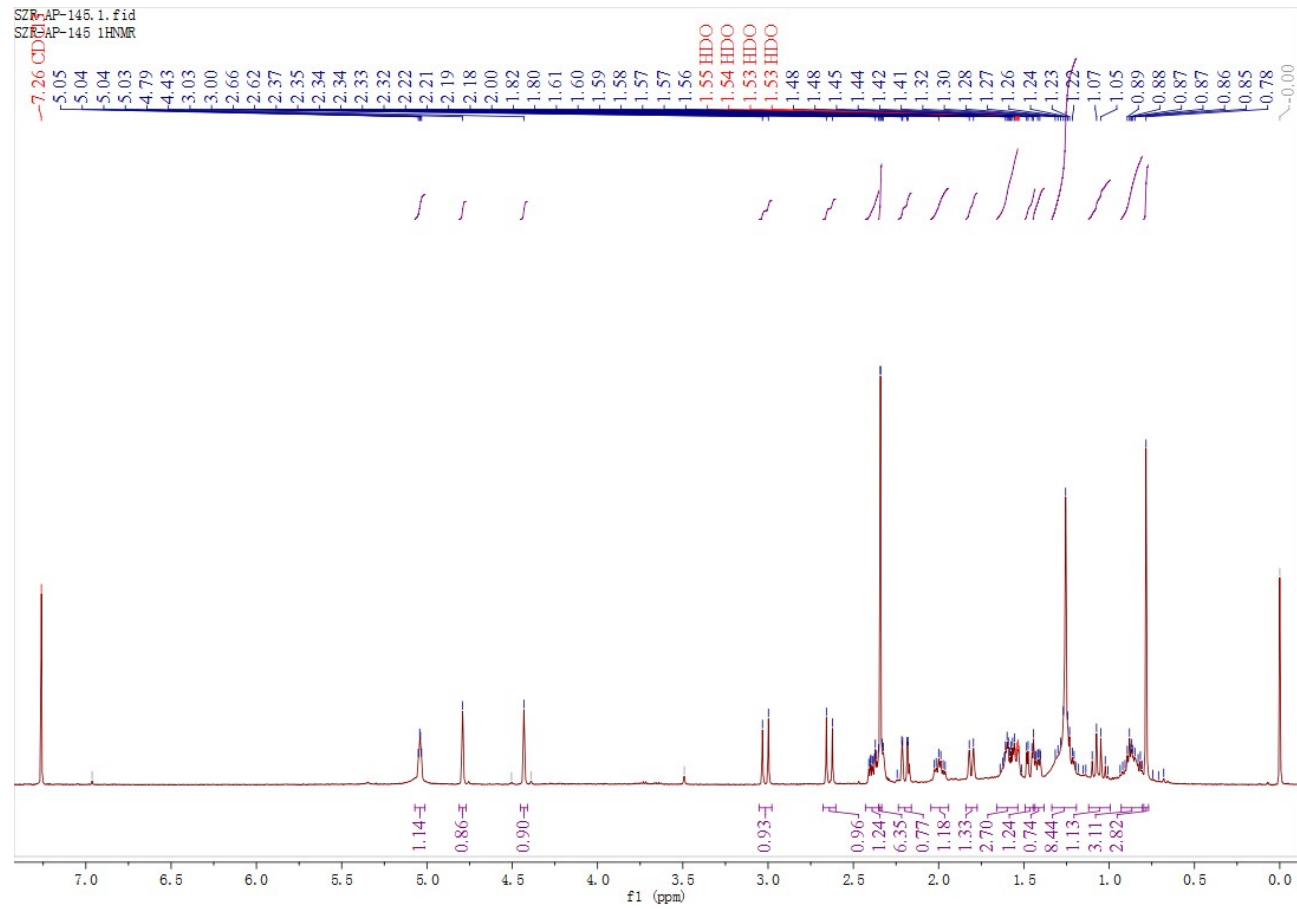

**Figure S8.**  $^{13}\text{C}$  and DEPT-135 NMR spectrum of Pertyolide A (**1**) in  $\text{CDCl}_3$

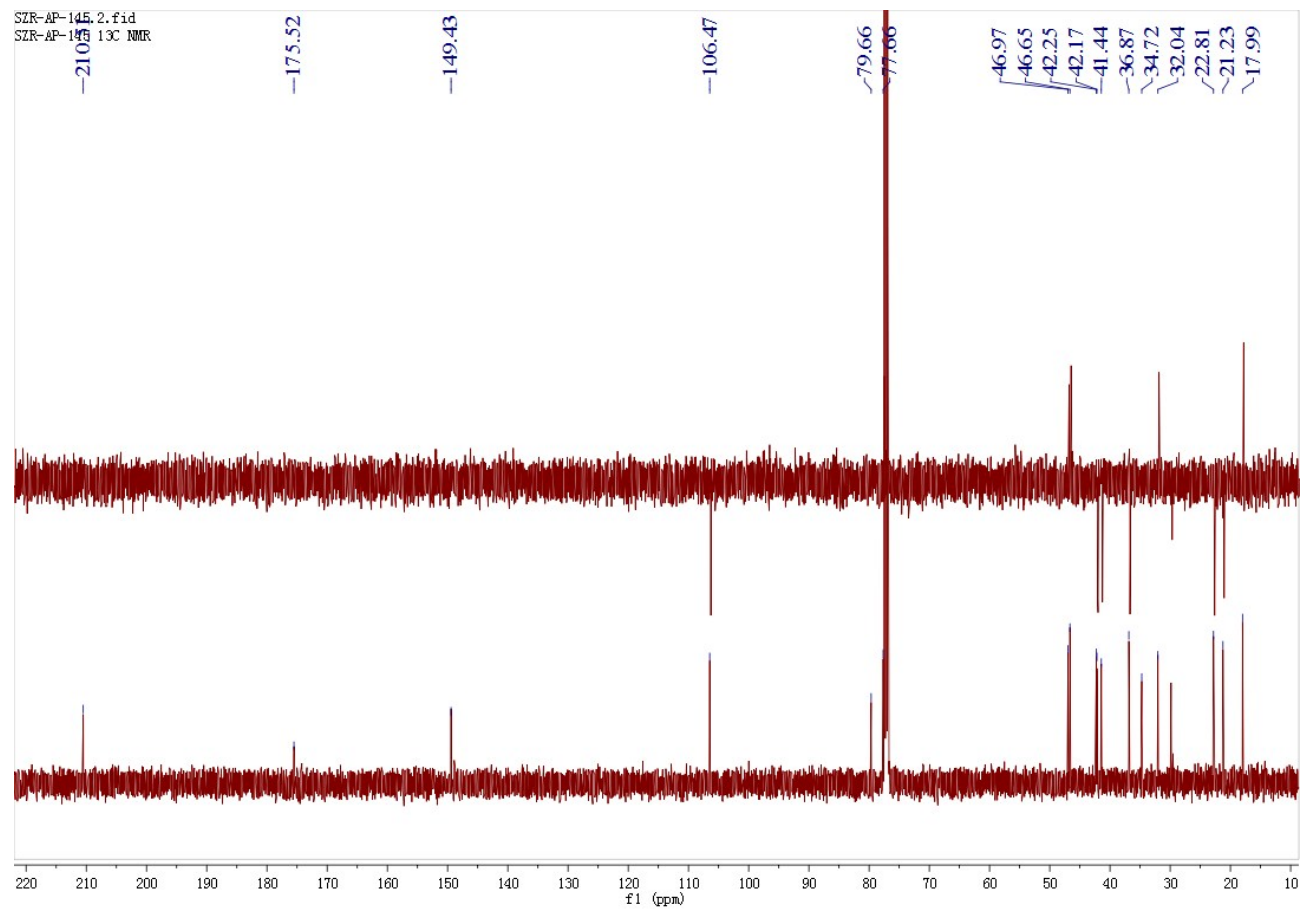

**Figure S9.**  $^1\text{H}$ - $^1\text{H}$  COSY spectrum of Pertyolide A (**1**) in  $\text{CDCl}_3$

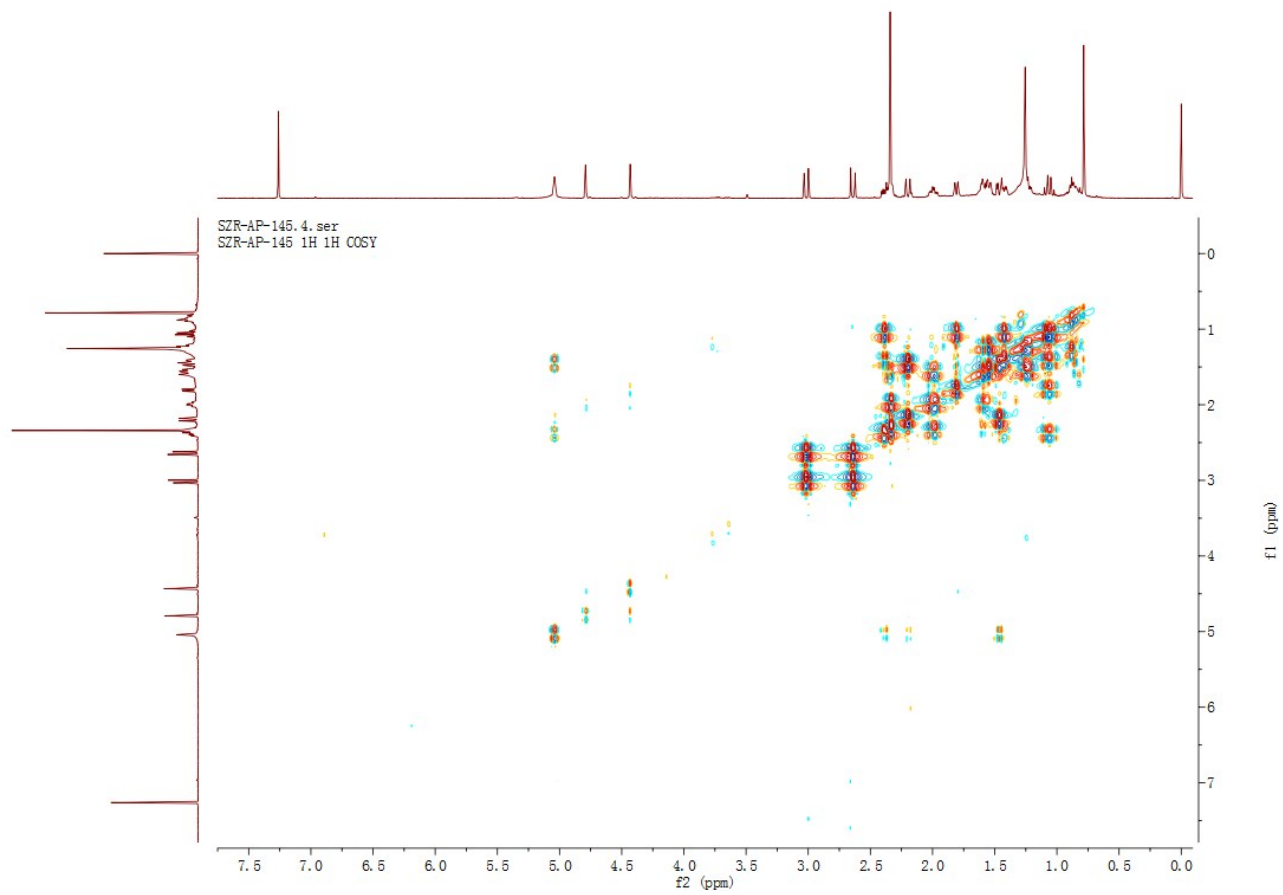

**Figure S10.** HSQC spectrum of Pertyolide A (**1**) in CDCl<sub>3</sub>

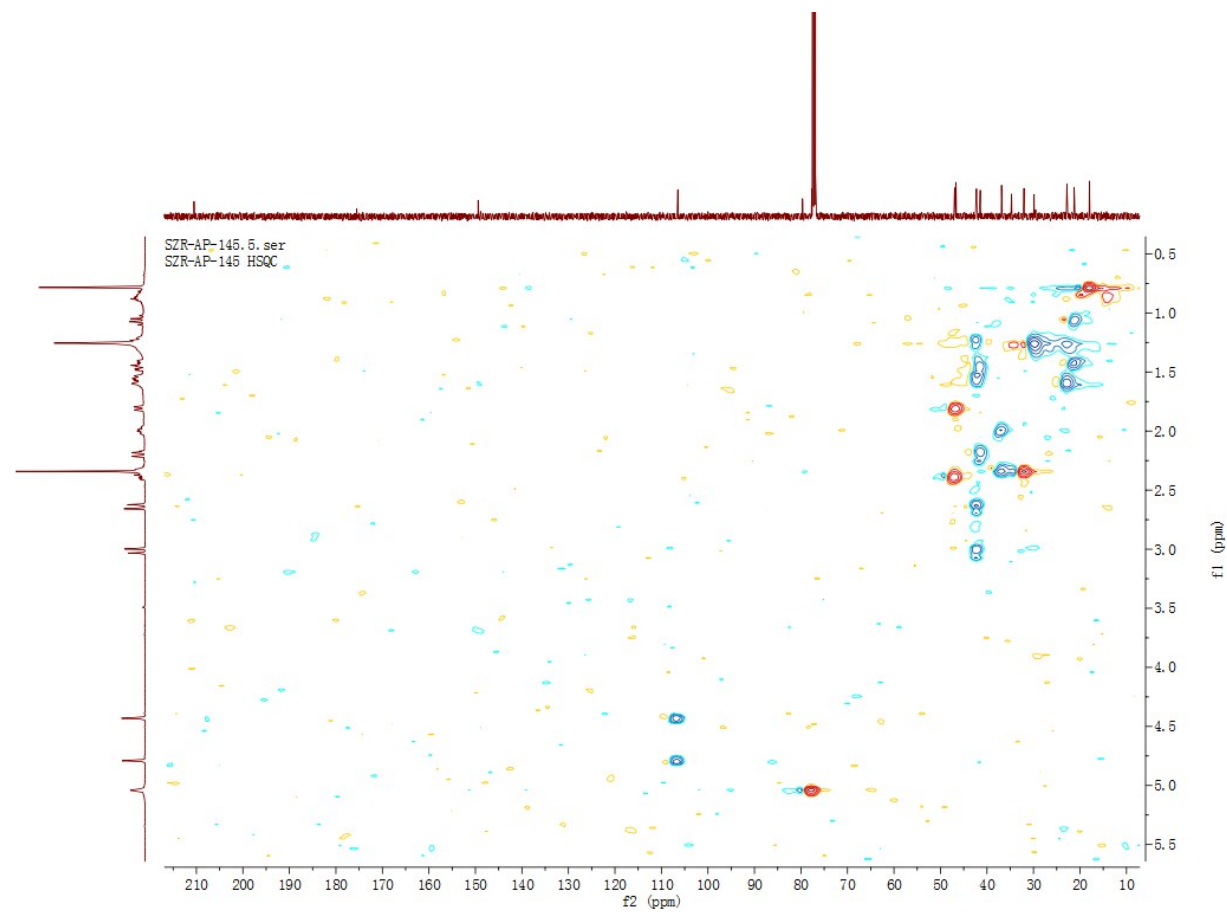

**Figure S11.** HMBC spectrum of Pertylide A (1) in CDCl<sub>3</sub>

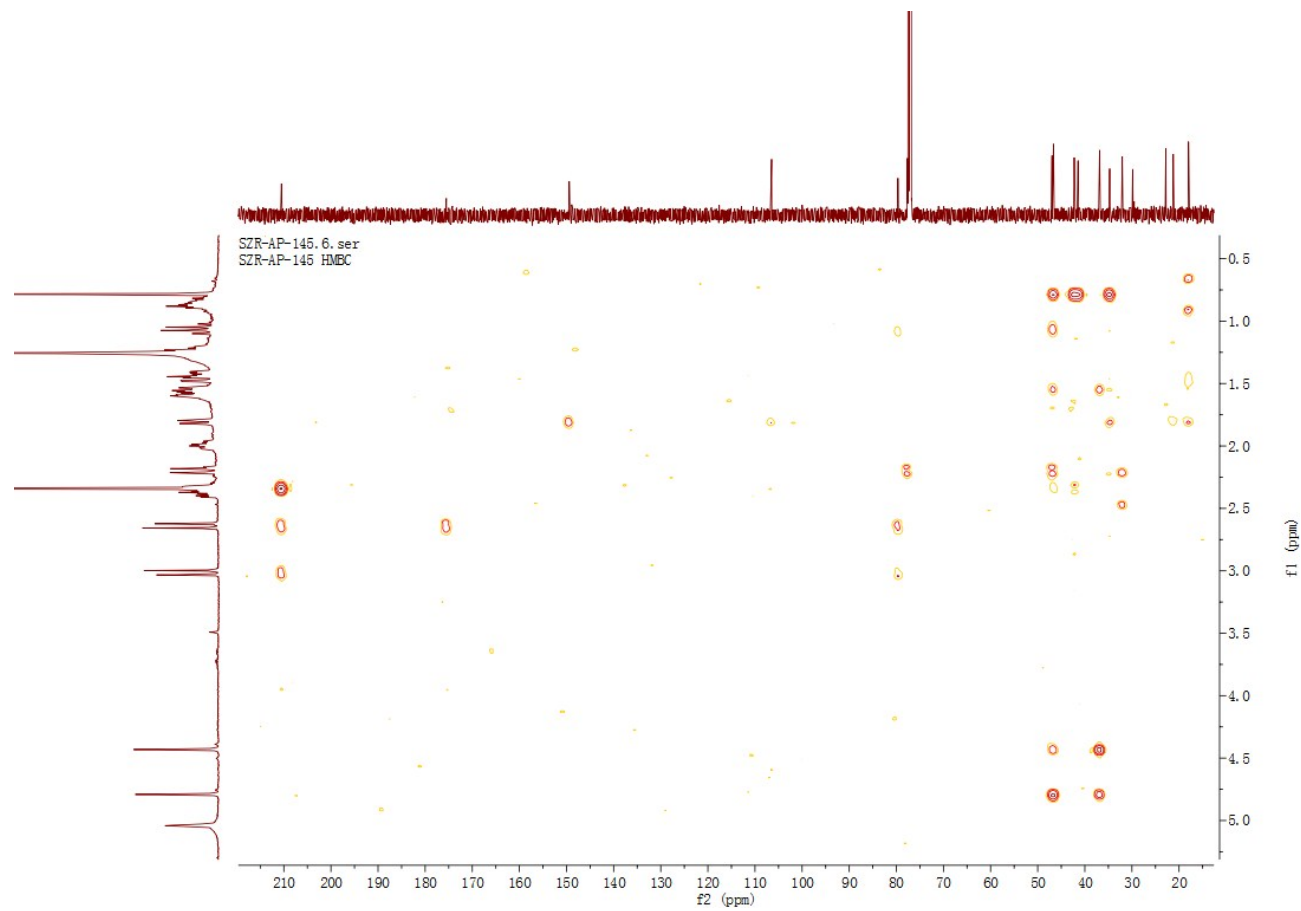



**Figure S12.** NOESY spectrum of Pertyolide A (**1**) in CDCl<sub>3</sub>

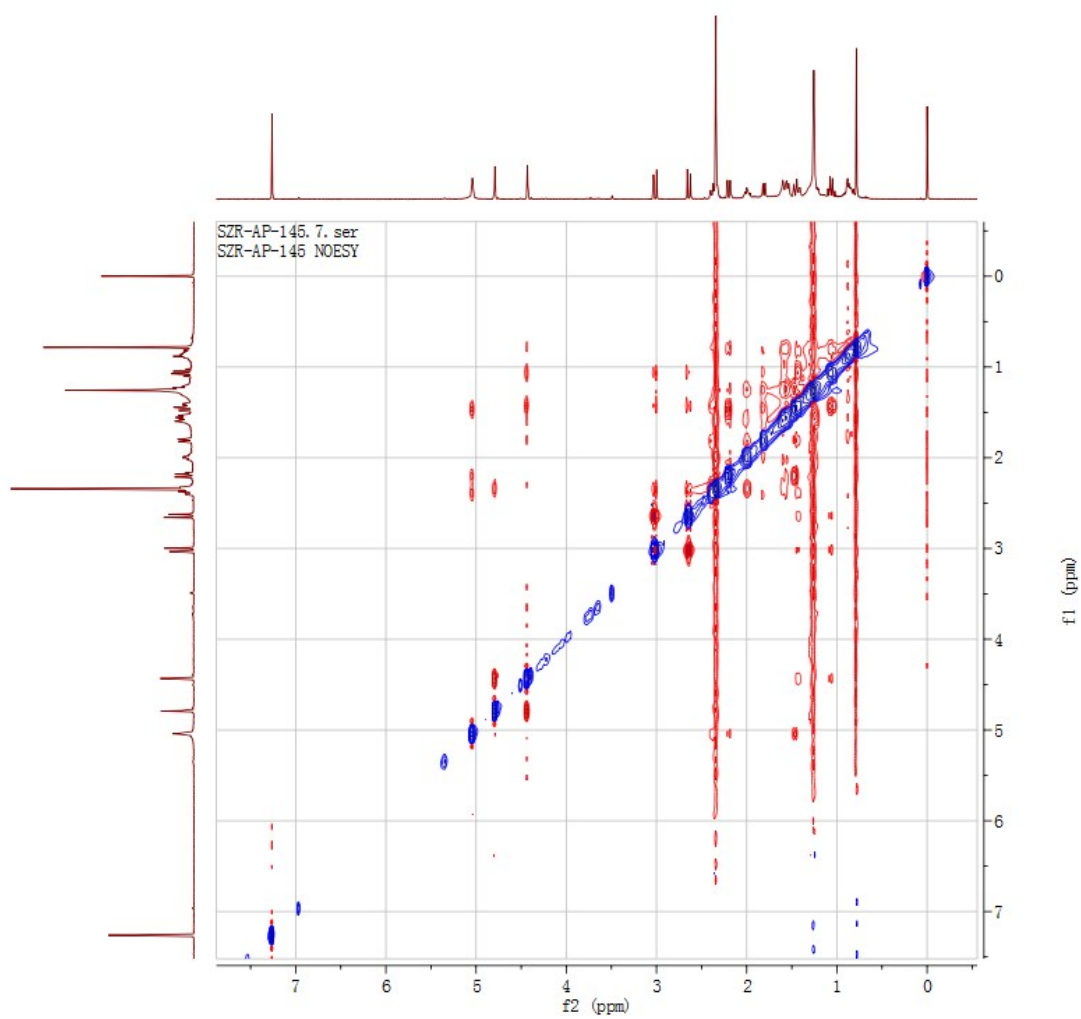

Figure S13. Single X-ray crystal structure and Packing diagram of 1

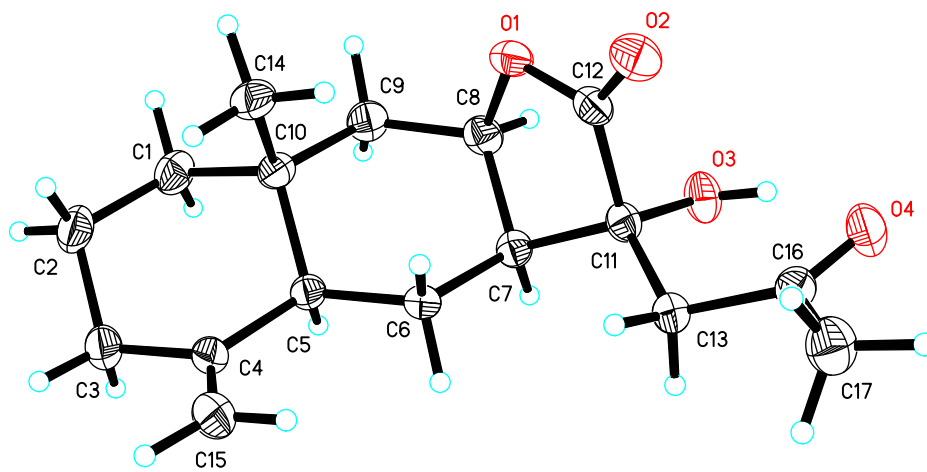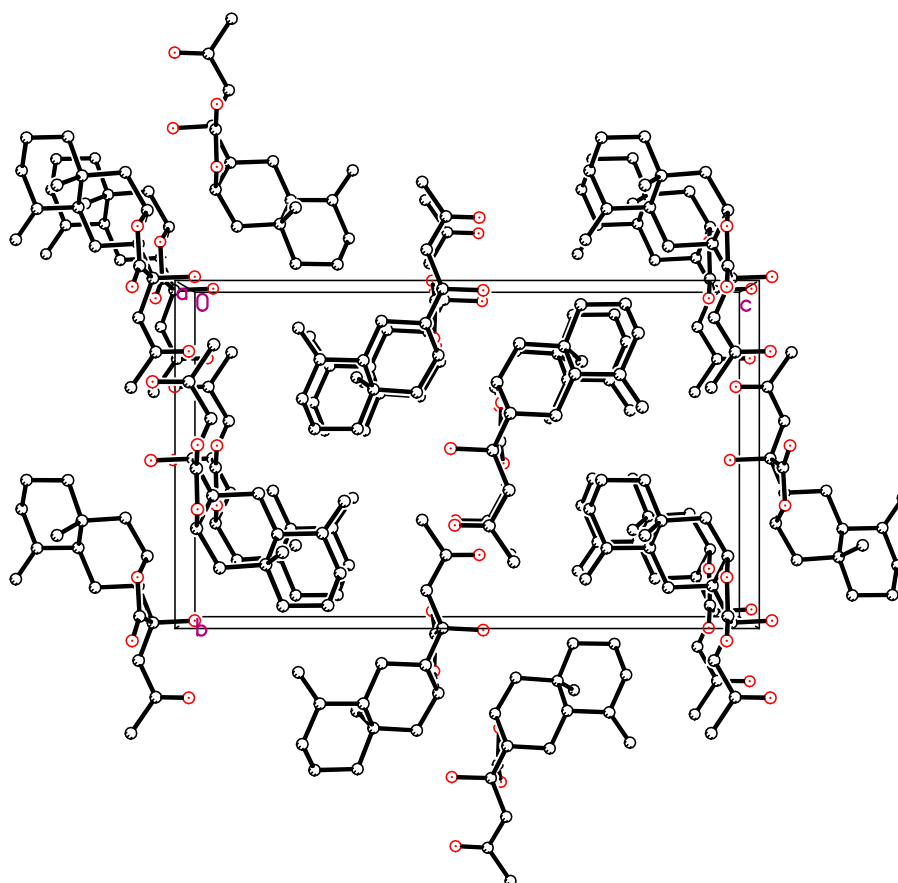

## Crystallographic data of Pertyolide A (1)

Table 1. Crystal data and structure refinement for cu\_dm15471\_0m.

|                                   |                                             |                       |
|-----------------------------------|---------------------------------------------|-----------------------|
| Identification code               | cu_dm15471_0m                               |                       |
| Empirical formula                 | C17 H24 O4                                  |                       |
| Formula weight                    | 292.36                                      |                       |
| Temperature                       | 296.15 K                                    |                       |
| Wavelength                        | 1.54178 Å                                   |                       |
| Crystal system                    | Orthorhombic                                |                       |
| Space group                       | P 21 21 21                                  |                       |
| Unit cell dimensions              | a = 6.38940(10) Å                           | $\alpha = 90^\circ$ . |
|                                   | b = 11.8924(2) Å                            | $\beta = 90^\circ$ .  |
|                                   | c = 19.9718(4) Å                            | $\gamma = 90^\circ$ . |
| Volume                            | 1517.56(5) Å <sup>3</sup>                   |                       |
| Z                                 | 4                                           |                       |
| Density (calculated)              | 1.280 Mg/m <sup>3</sup>                     |                       |
| Absorption coefficient            | 0.727 mm <sup>-1</sup>                      |                       |
| F(000)                            | 632                                         |                       |
| Crystal size                      | 0.2 x 0.08 x 0.05 mm <sup>3</sup>           |                       |
| Theta range for data collection   | 4.327 to 70.024°.                           |                       |
| Index ranges                      | -7<=h<=6, -14<=k<=14, -23<=l<=24            |                       |
| Reflections collected             | 9899                                        |                       |
| Independent reflections           | 2731 [R(int) = 0.0285]                      |                       |
| Completeness to theta = 67.679°   | 97.9 %                                      |                       |
| Absorption correction             | Semi-empirical from equivalents             |                       |
| Max. and min. transmission        | 0.7533 and 0.6447                           |                       |
| Refinement method                 | Full-matrix least-squares on F <sup>2</sup> |                       |
| Data / restraints / parameters    | 2731 / 0 / 193                              |                       |
| Goodness-of-fit on F <sup>2</sup> | 1.060                                       |                       |
| Final R indices [I>2sigma(I)]     | R1 = 0.0332, wR2 = 0.0881                   |                       |
| R indices (all data)              | R1 = 0.0341, wR2 = 0.0896                   |                       |
| Absolute structure parameter      | 0.02(7)                                     |                       |
| Extinction coefficient            | n/a                                         |                       |
| Largest diff. peak and hole       | 0.147 and -0.174 e.Å <sup>-3</sup>          |                       |

**Figure S14.** HR-ESIMS spectrum of Pertyolide B (2)

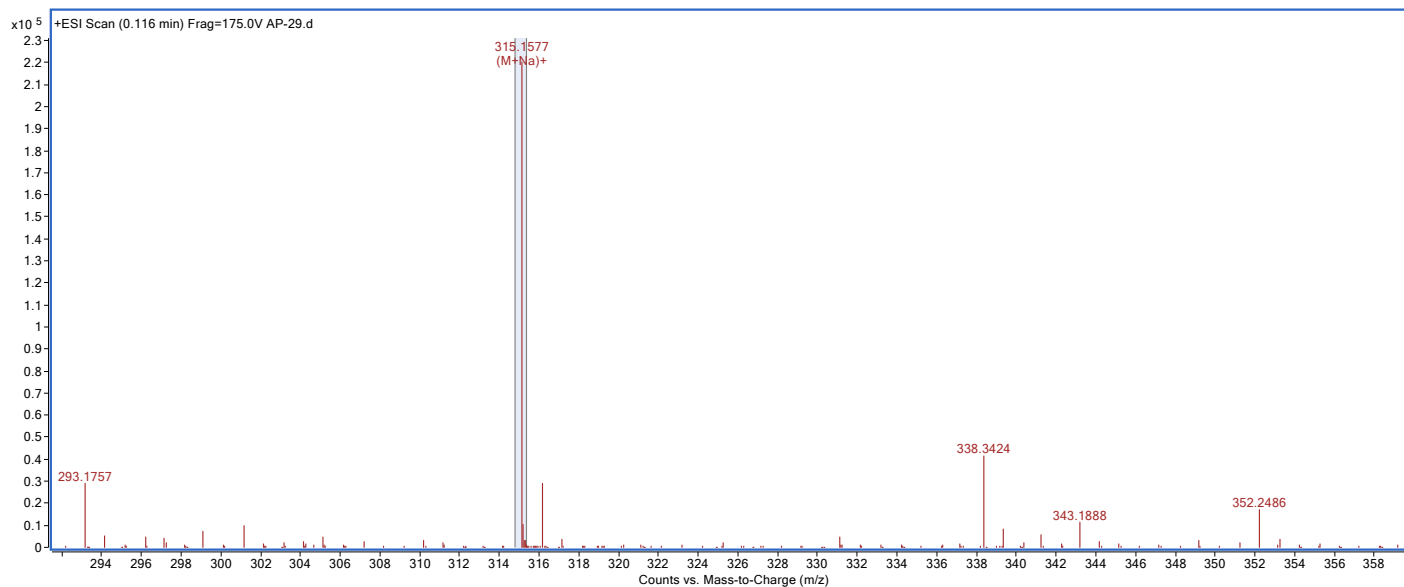

| m/z      | Ion         | Formula       | Abundance |       |             |          |           |
|----------|-------------|---------------|-----------|-------|-------------|----------|-----------|
| 315.1577 | (M+Na)+     | C17 H24 Na O4 | 220045.8  |       |             |          |           |
| Best     | Formula (M) | Ion Formula   | Calc m/z  | Score | Cross Score | Mass     | Calc Mass |
| TRUE     | C17 H24 O4  | C17 H24 Na O4 | 315.1567  | 89.79 |             | 292.1684 | 292.1675  |

Figure S15. IR spectrum of Pertyolide B (2)

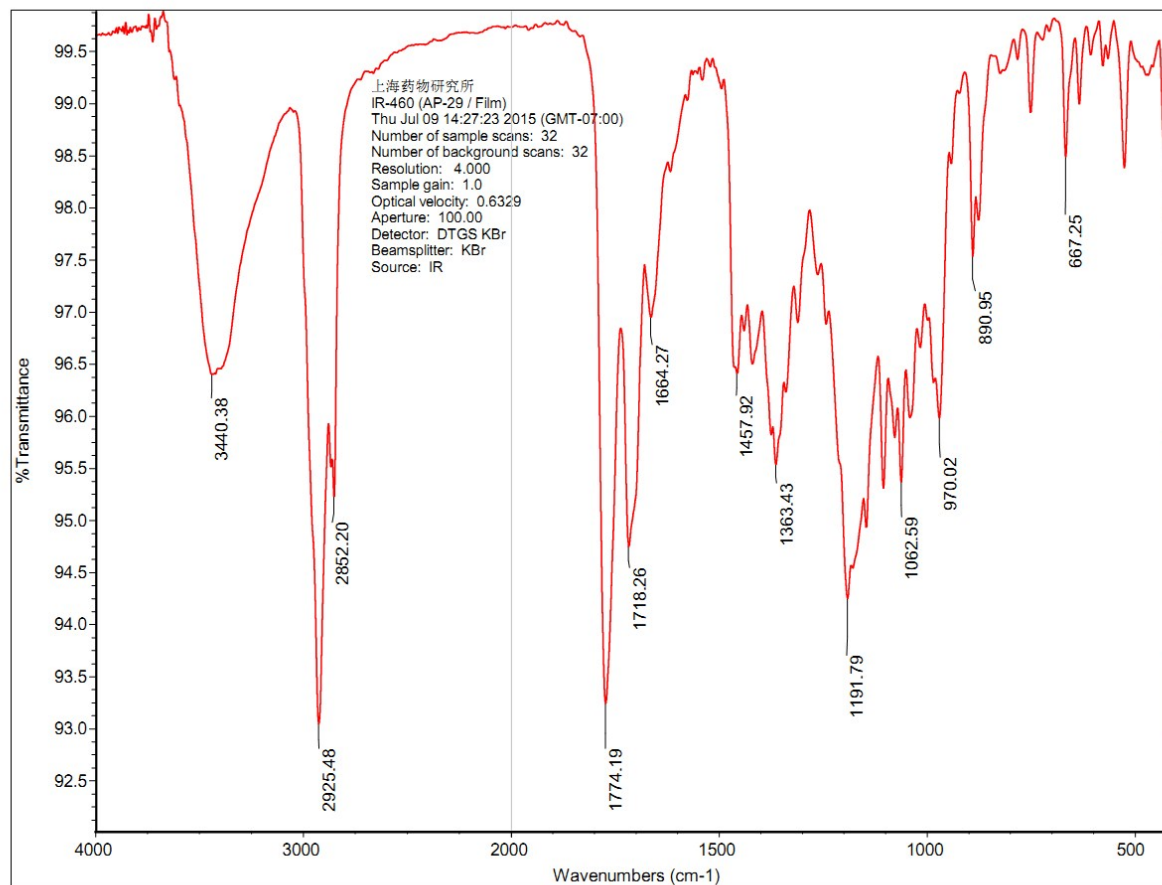

**Figure S16.** OR Value of Pertyolide B (2) in CH<sub>3</sub>OH

**Rudolph Research Analytical**

Tuesday, 03/24/2015

This sample was measured on an Autopol VI, serial number 90079, manufactured by Rudolph Research Analytical, Hackettstown, NJ.

LotID : 085/MeOH  
Set Temperature : 20.0  
Temp Corr : OFF

| n    | Average   | Std.Dev.    | Maximum | Minimum |          |     |        |       |       |         |
|------|-----------|-------------|---------|---------|----------|-----|--------|-------|-------|---------|
| 6    | 1.167     | 0.4082      | 2.000   | 1.000   |          |     |        |       |       |         |
| S.No | Sample ID | Time        | Result  | Scale   | OR ° Arc | WLG | Lg.mm  | Conc. | Temp. | Comment |
| 1    | AP-29     | 02:48:22 PM | 1.000   | SR      | 0.001    | 589 | 100.00 | 0.100 | 20.0  |         |
| 2    | AP-29     | 02:48:28 PM | 1.000   | SR      | 0.001    | 589 | 100.00 | 0.100 | 20.0  |         |
| 3    | AP-29     | 02:48:34 PM | 1.000   | SR      | 0.001    | 589 | 100.00 | 0.100 | 20.0  |         |
| 4    | AP-29     | 02:48:40 PM | 2.000   | SR      | 0.002    | 589 | 100.00 | 0.100 | 20.0  |         |
| 5    | AP-29     | 02:48:46 PM | 1.000   | SR      | 0.001    | 589 | 100.00 | 0.100 | 20.0  |         |
| 6    | AP-29     | 02:48:52 PM | 1.000   | SR      | 0.001    | 589 | 100.00 | 0.100 | 20.0  |         |

Signature

**Figure S17.** UV spectrum of Pertyolide B (2) in CH<sub>3</sub>OH

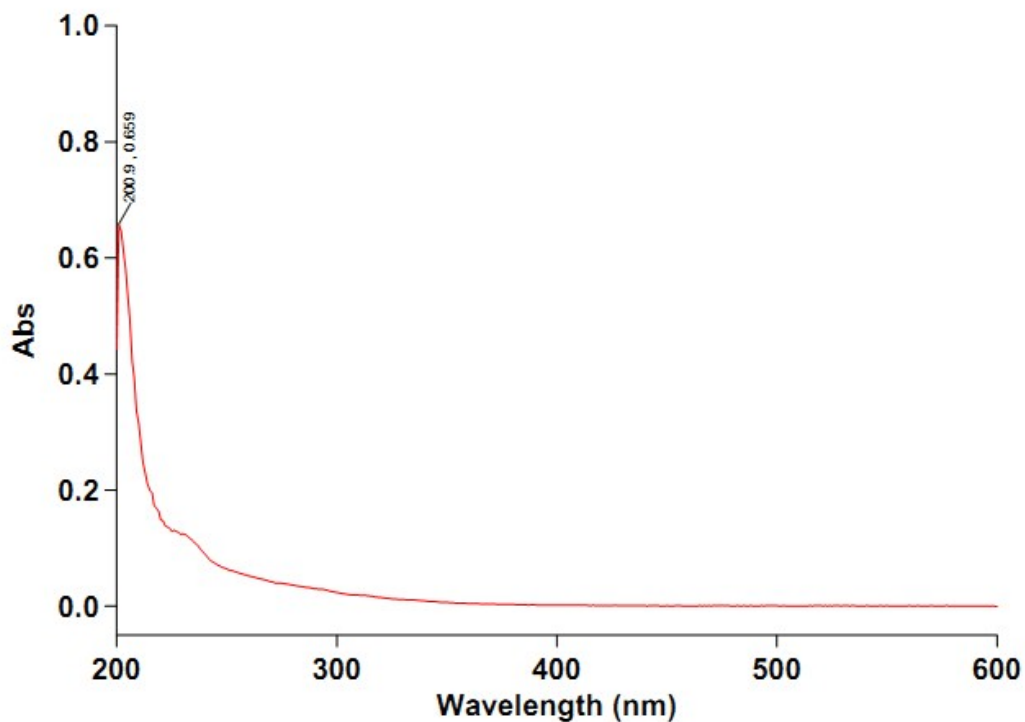

**Figure S18.** CD spectrum of Pertyolide B (**2**) in CH<sub>3</sub>OH

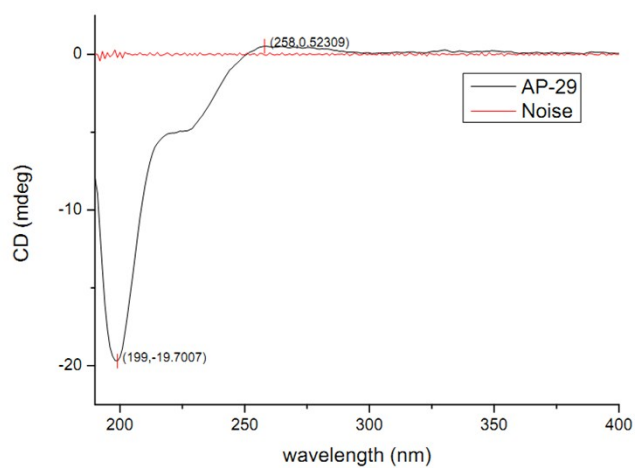

|                            |                            |
|----------------------------|----------------------------|
| Date                       | 2015/3/25                  |
| Instrument                 | Chirascan                  |
| Serial No.                 | CS 30049                   |
| Detector                   | Photomultiplier Tube (PMT) |
| Lamp                       | 150 watt xenon arc         |
| Bandwidth(nm)              | 1.0                        |
| Wavelength range(nm)       | 400 to 190                 |
| Time per step (seconds)    | 0.5                        |
| Wavelength step (nm)       | 1.0                        |
| Cell pathlength(mm)        | 0.5                        |
| Concentration (mg/mL)      | 0.5                        |
| Data manipulation          | MeOH subtraction           |
| Temperature (°C)           | Room temperature           |
| Number of spectra averaged | Sample 3                   |
| Smoothing                  | 3 point Savitsky-Golay     |
| Sample Name                | AP-29                      |
| Operator                   | Lin                        |
| Comment                    |                            |

Signature

**Figure S19.** <sup>1</sup>H- NMR spectrum of Pertyolide B (**2**) in CDCl<sub>3</sub>

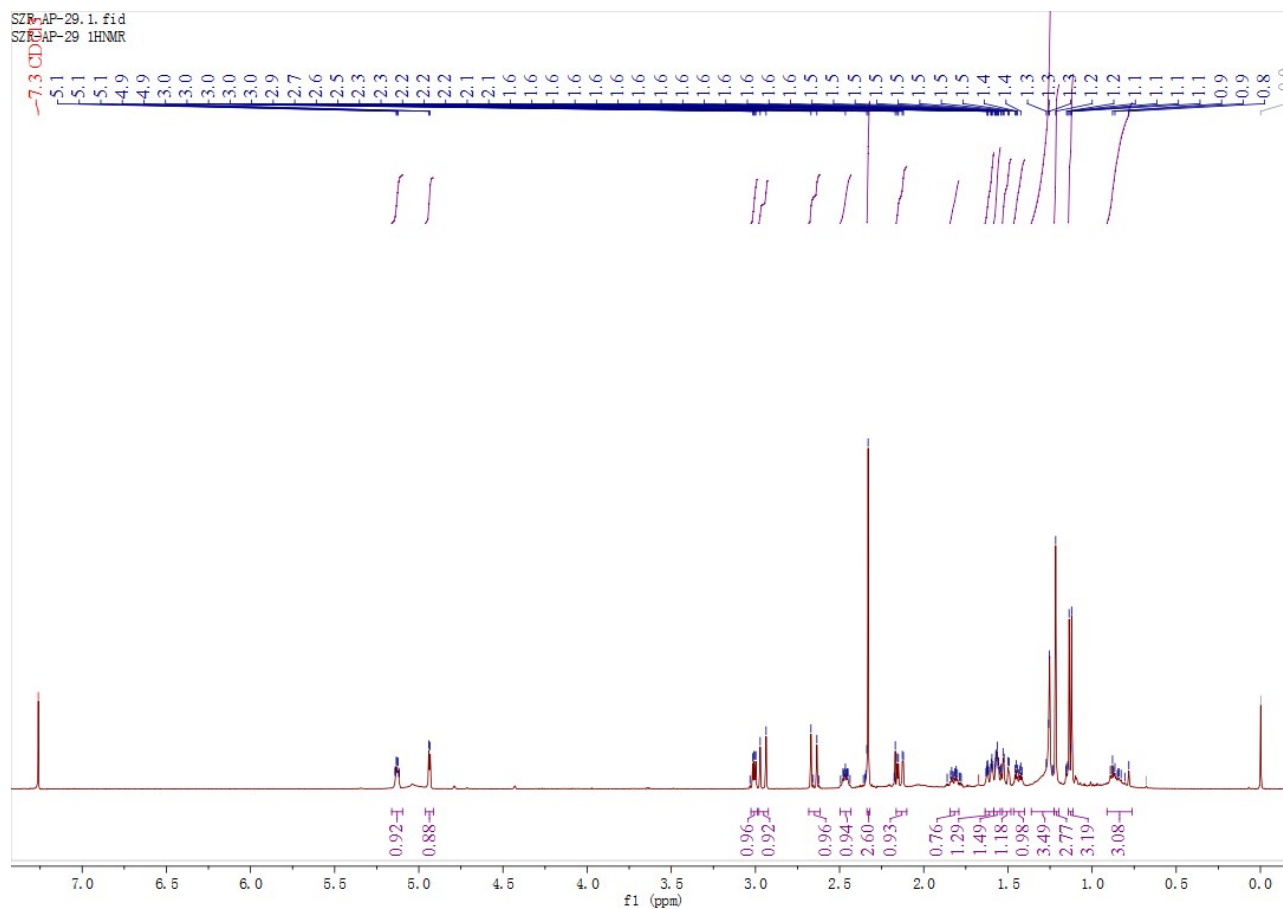



**Figure S20.**  $^{13}\text{C}$  and DEPT-135 NMR spectrum of Pertyolide B (**2**) in  $\text{CDCl}_3$

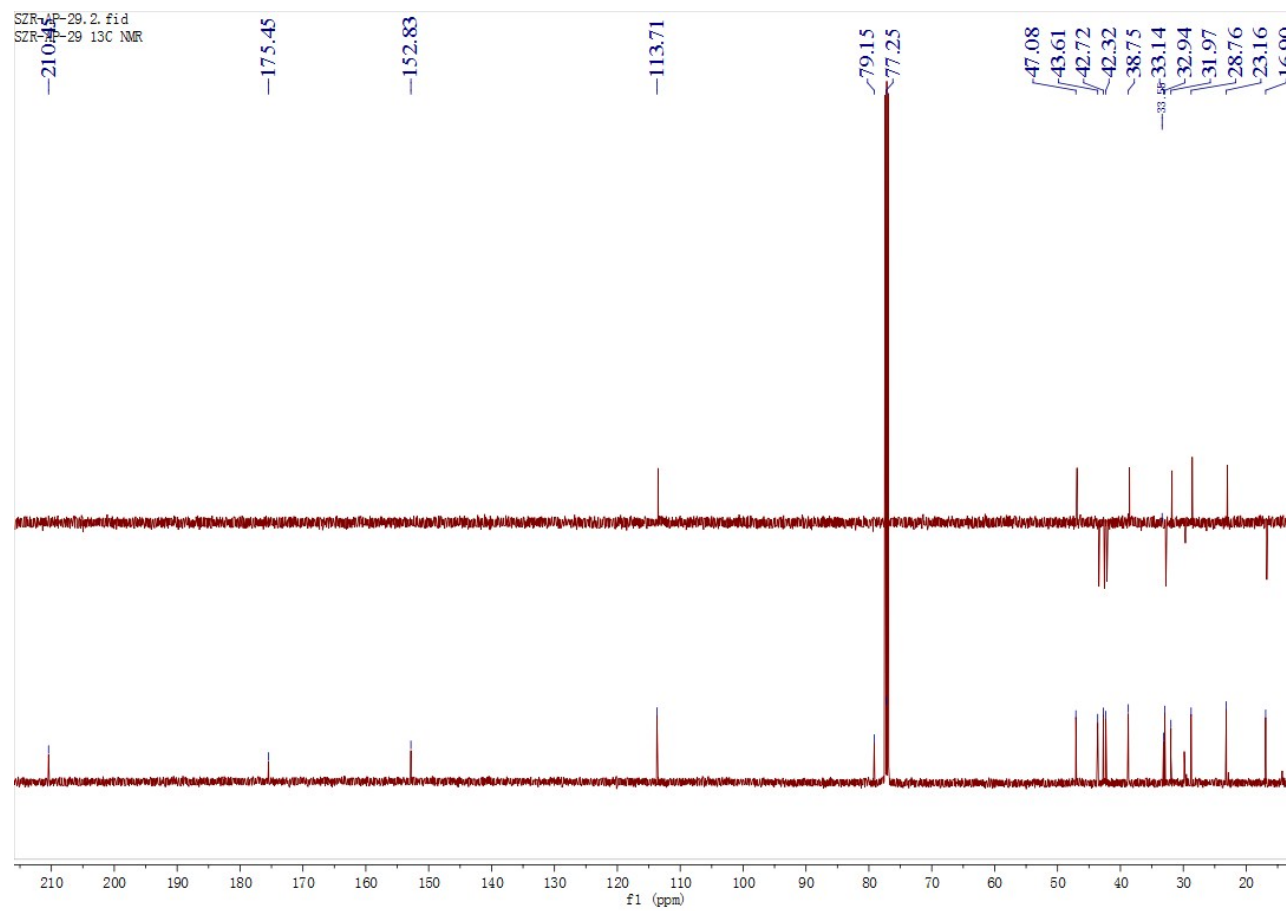

**Figure S21.**  $^1\text{H}$ - $^1\text{H}$  COSY spectrum of Pertyolide B (**2**) in  $\text{CDCl}_3$

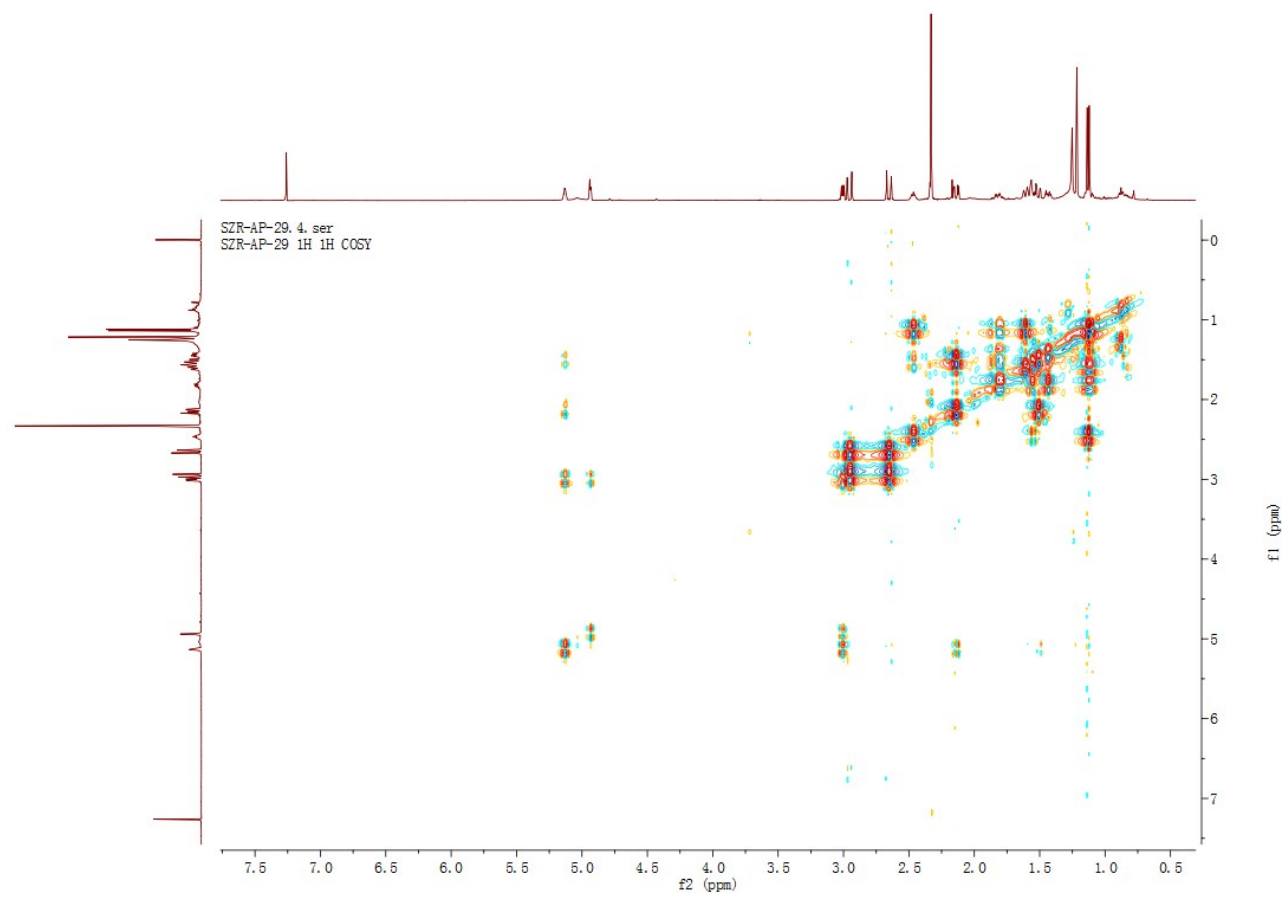

**Figure S22.** HSQC spectrum of Pertyolide B (**2**) in CDCl<sub>3</sub>

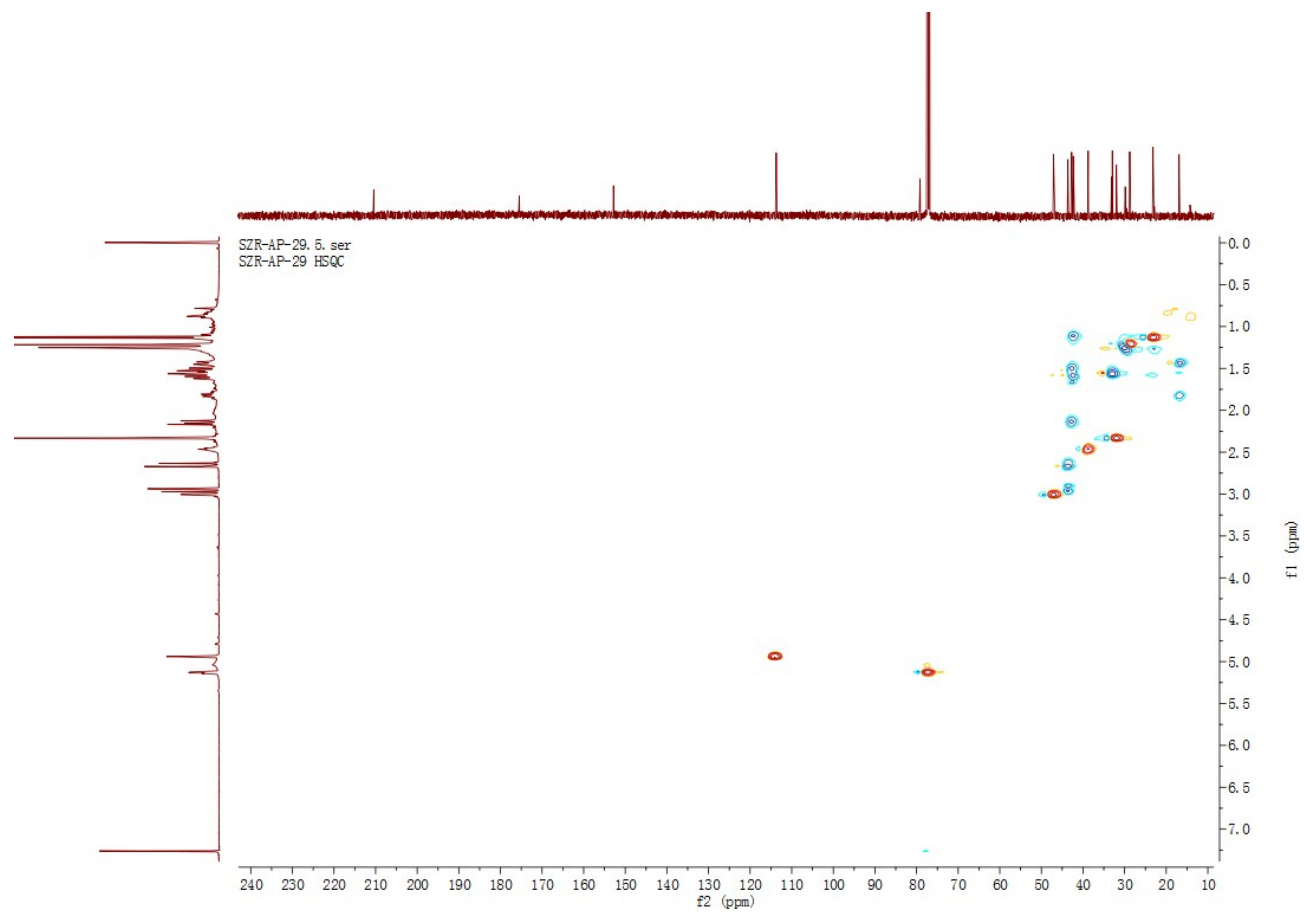

**Figure S23.** HMBC spectrum of Pertyolide B (**2**) in CDCl<sub>3</sub>

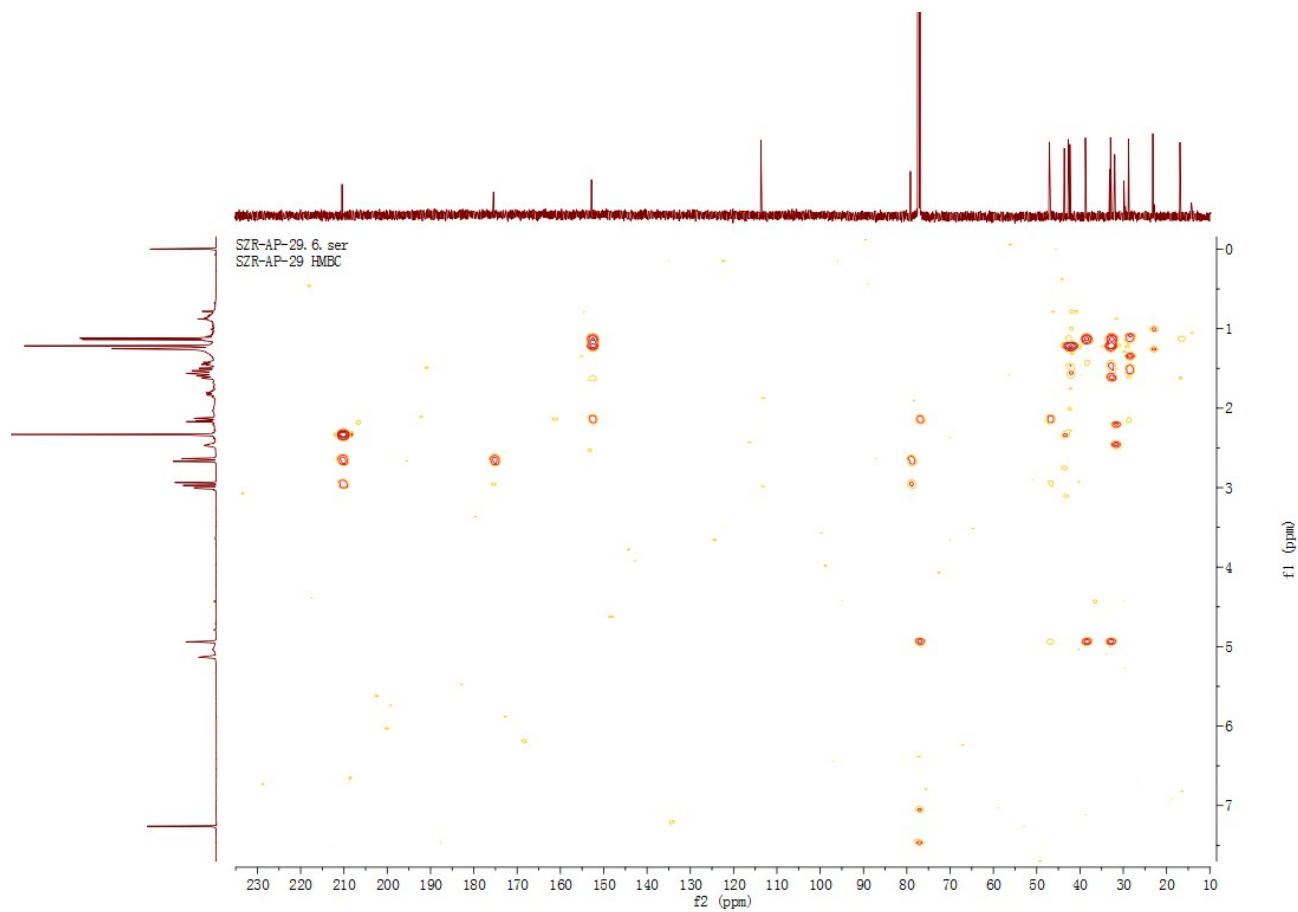

**Figure S24.** NOESY spectrum of Pertyolide B (2) in CDCl<sub>3</sub>

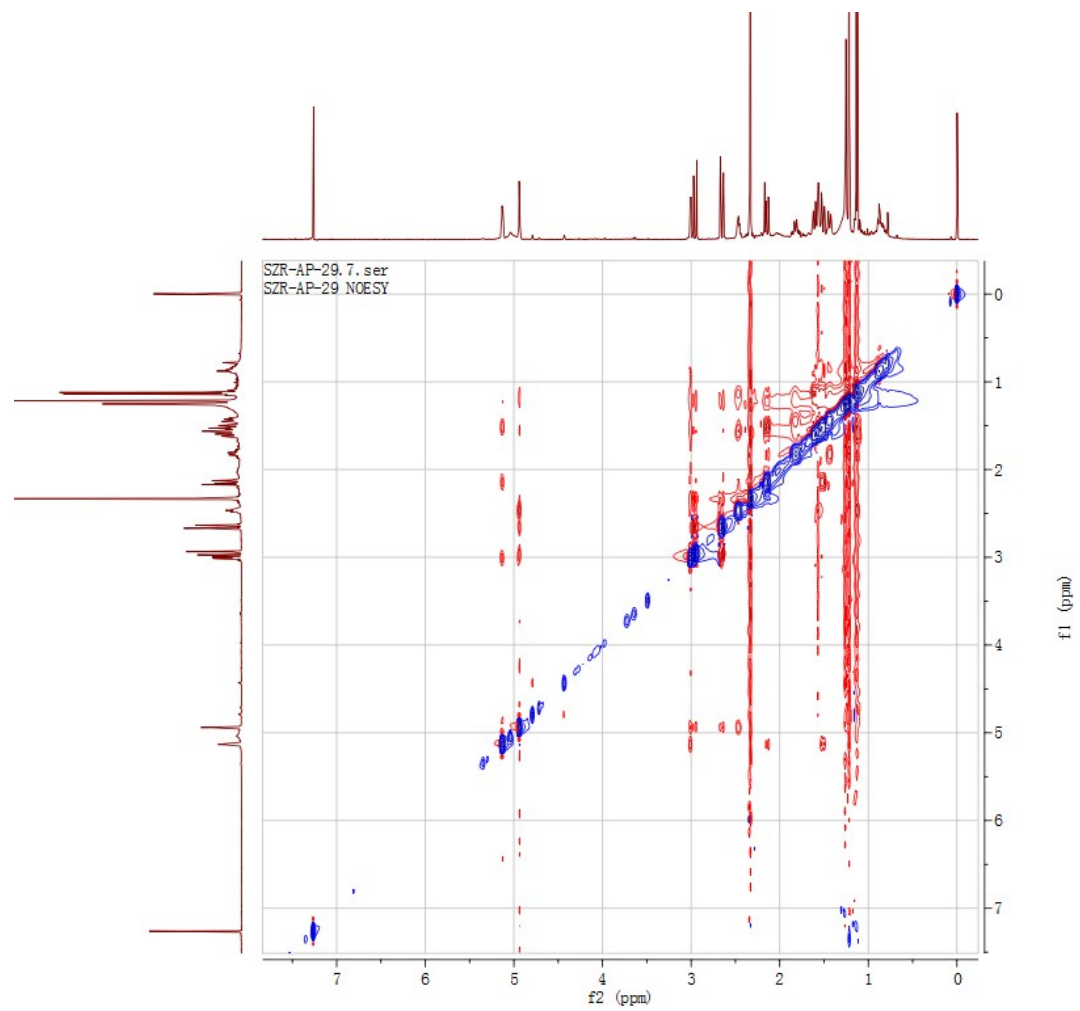

**Figure S25.** HR-ESIMS spectrum of Pertyolide C (3)

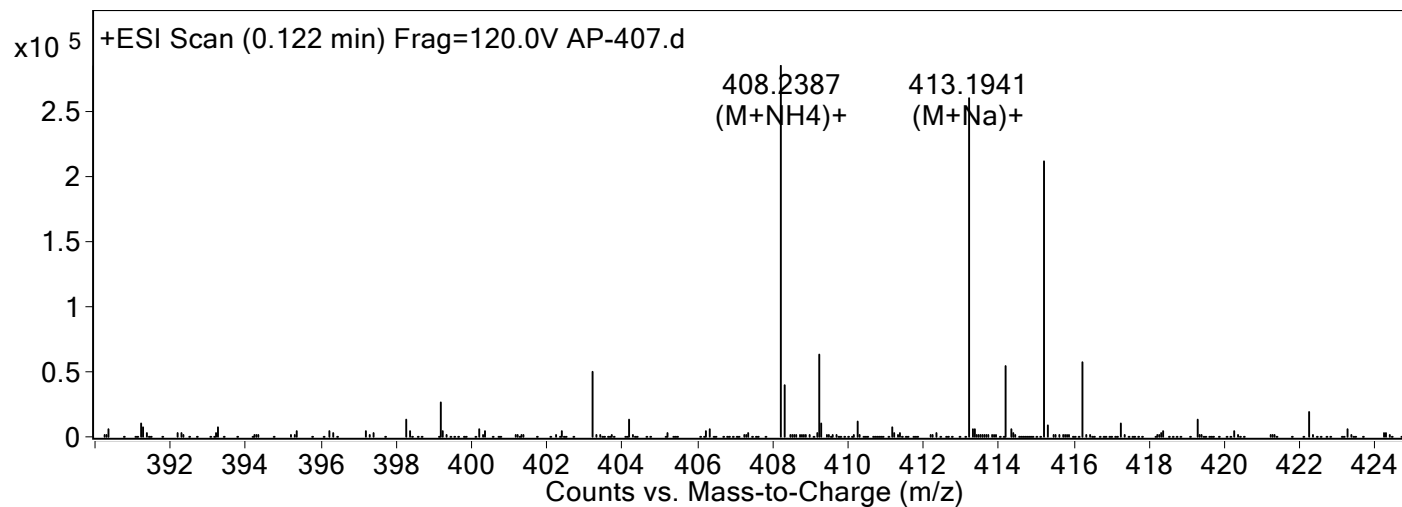

| Formula Calculator Results |      |          |          |            |               |       |
|----------------------------|------|----------|----------|------------|---------------|-------|
| Formula                    | Best | Mass     | Tgt Mass | Diff (ppm) | Ion Species   | Score |
| C22 H30 O6                 | TRUE | 390.2048 | 390.2042 | -1.54      | C22 H34 N O6  | 97.46 |
| C22 H30 O6                 | TRUE | 390.2049 | 390.2042 | -1.74      | C22 H30 Na O6 | 80.87 |

Figure S26. IR spectrum of Pertyolide C (3)

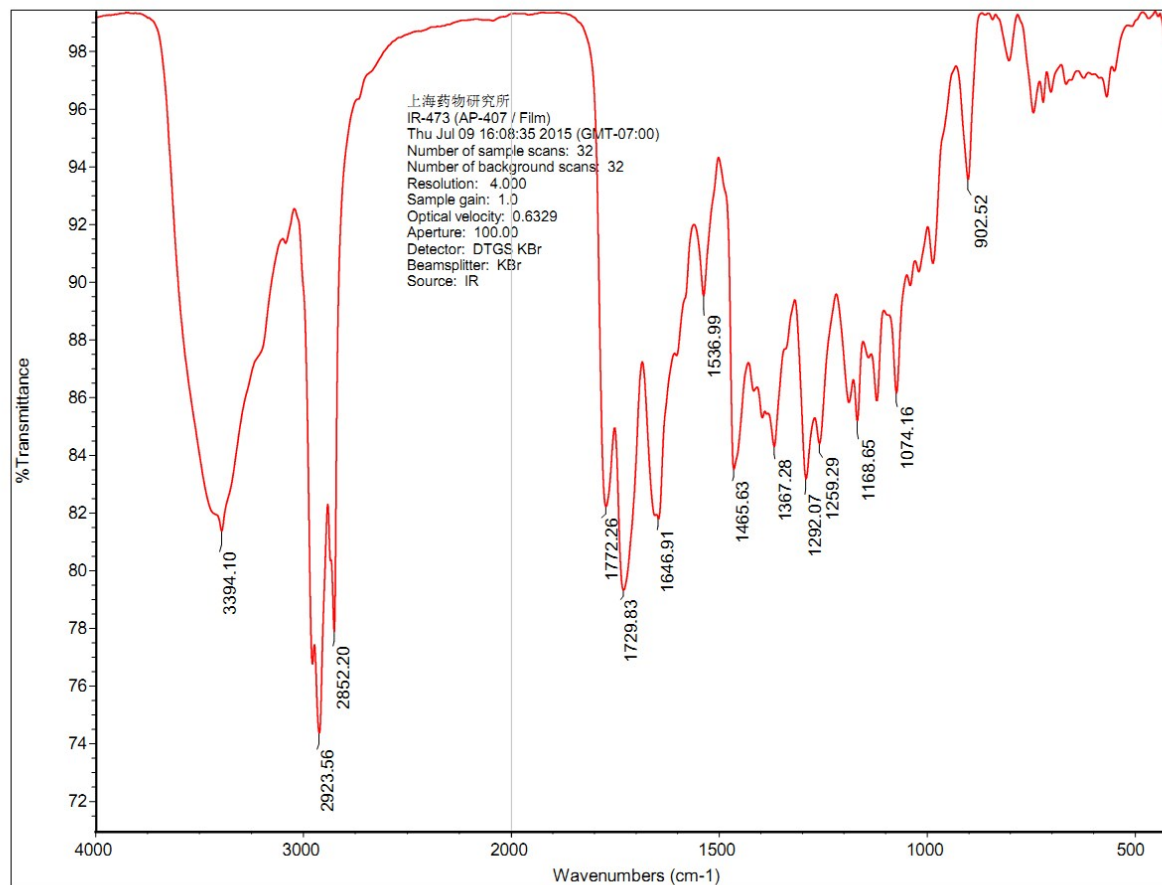

**Figure S27.** OR Value of Pertyolide C (3) in CH<sub>3</sub>OH

**Rudolph Research Analytical**

Thursday, 05/14/2015

This sample was measured on an Autopol VI, serial number 90079,  
manufactured by Rudolph Research Analytical, Hackettstown, NJ.

LotID : 157/MeOH  
Set Temperature : 20.0  
Temp Corr : OFF

| n    | Average   | Std.Dev.    | Maximum | Minimum |          |     |        |       |       |         |
|------|-----------|-------------|---------|---------|----------|-----|--------|-------|-------|---------|
| 6    | 17.000    | 0.0000      | 17.000  | 17.000  |          |     |        |       |       |         |
| S.No | Sample ID | Time        | Result  | Scale   | OR ° Arc | WLG | Lg.mm  | Conc. | Temp. | Comment |
| 1    | AP-407    | 10:15:31 AM | 17.000  | SR      | 0.017    | 589 | 100.00 | 0.100 | 20.3  |         |
| 2    | AP-407    | 10:15:37 AM | 17.000  | SR      | 0.017    | 589 | 100.00 | 0.100 | 20.2  |         |
| 3    | AP-407    | 10:15:43 AM | 17.000  | SR      | 0.017    | 589 | 100.00 | 0.100 | 20.2  |         |
| 4    | AP-407    | 10:15:49 AM | 17.000  | SR      | 0.017    | 589 | 100.00 | 0.100 | 20.2  |         |
| 5    | AP-407    | 10:15:55 AM | 17.000  | SR      | 0.017    | 589 | 100.00 | 0.100 | 20.2  |         |
| 6    | AP-407    | 10:16:01 AM | 17.000  | SR      | 0.017    | 589 | 100.00 | 0.100 | 20.2  |         |

Signature

**Figure S28.** UV spectrum of Pertyolide C (3) in CH<sub>3</sub>OH

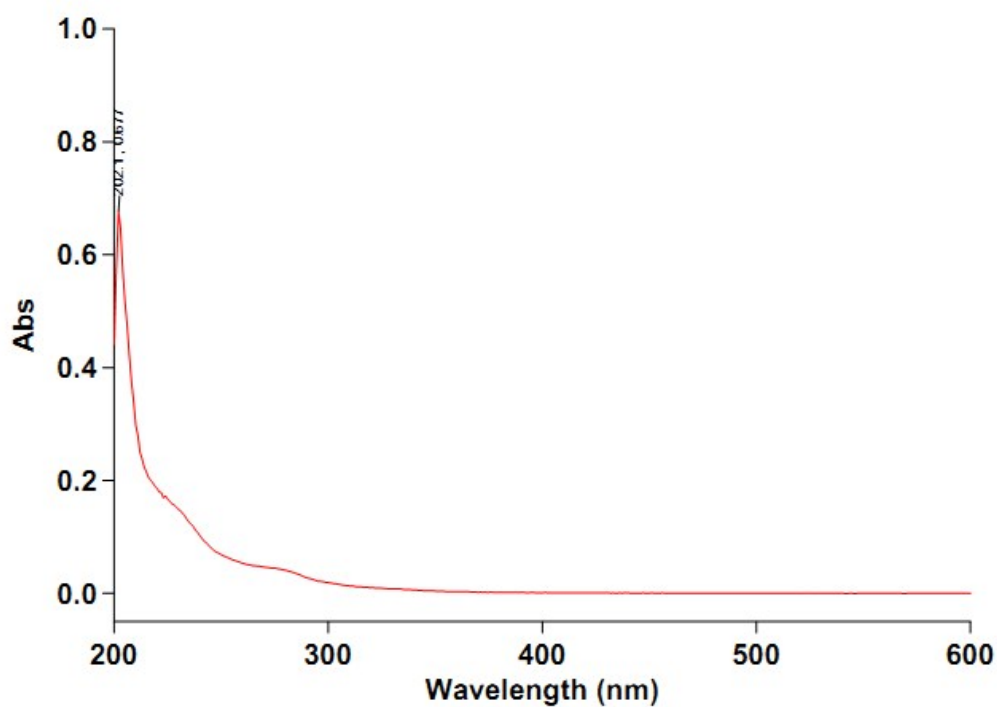



Figure S29. <sup>1</sup>H- NMR spectrum of Pertyolide C (**3**) in CDCl<sub>3</sub>

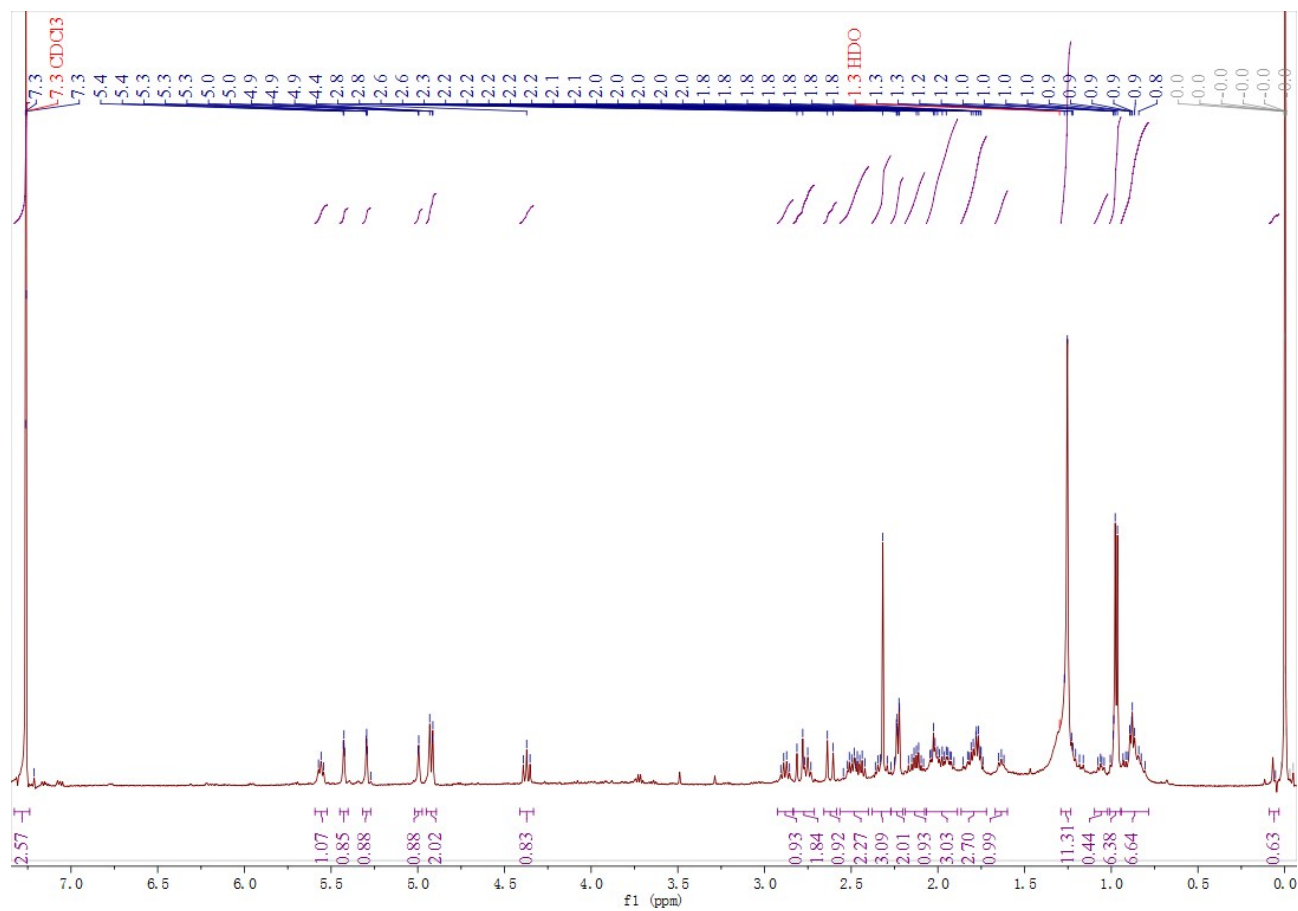

**Figure S30.**  $^{13}\text{C}$  and DEPT-135 NMR spectrum of Pertyolide C (**3**) in  $\text{CDCl}_3$

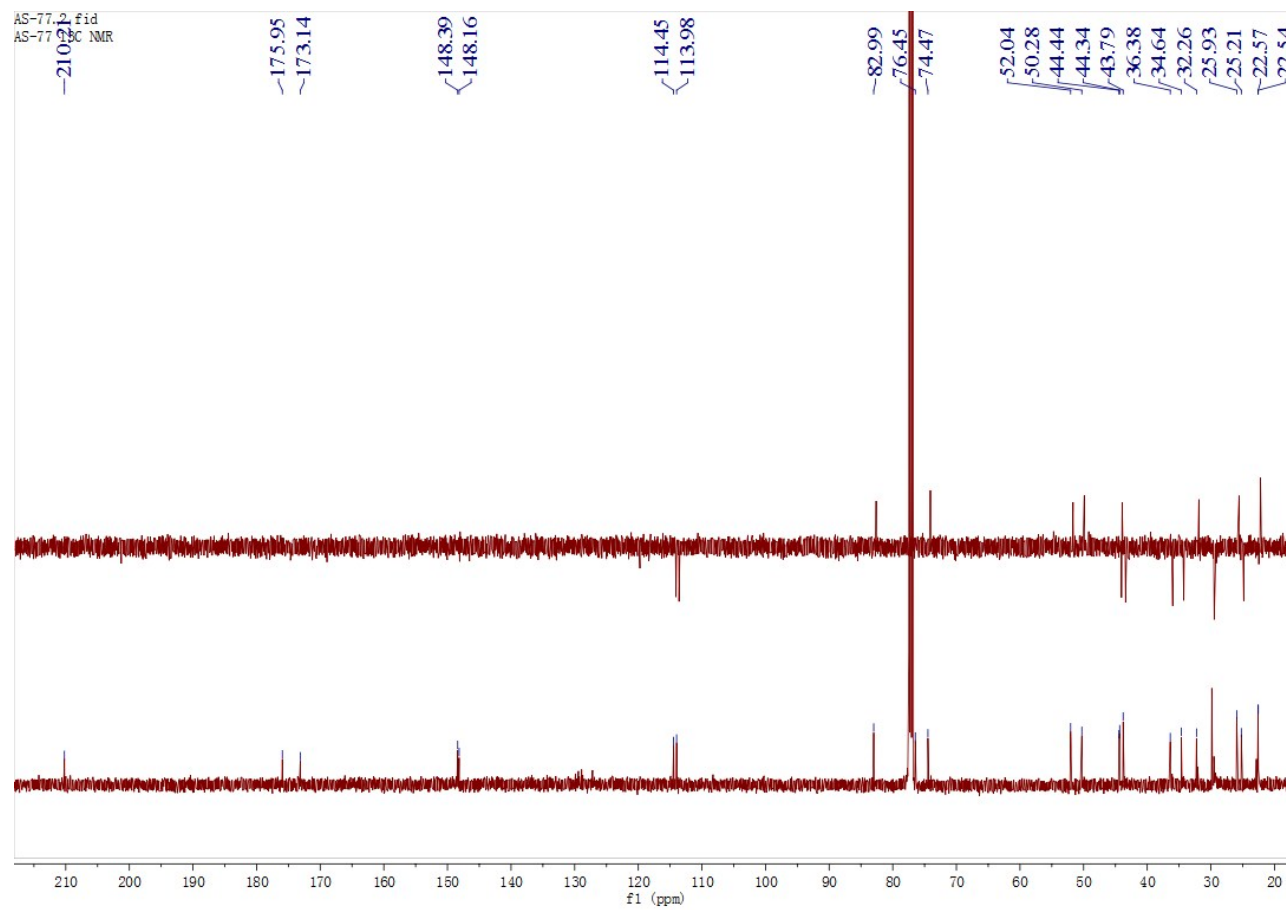

**Figure S31.**  $^1\text{H}$ - $^1\text{H}$  COSY spectrum of Pertyolide C (**3**) in  $\text{CDCl}_3$

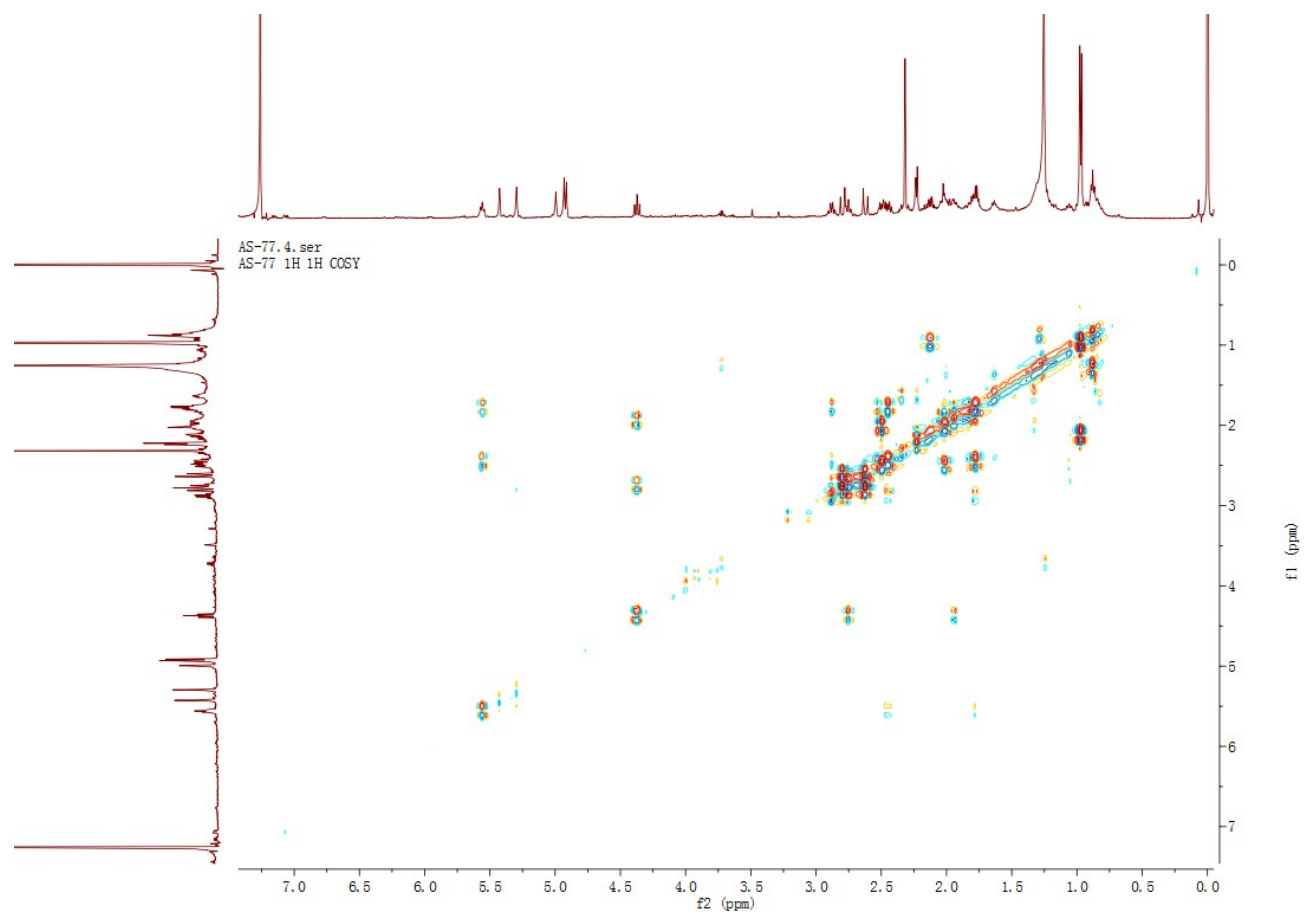

**Figure S32.** HSQC spectrum of Pertyolide C (**3**) in CDCl<sub>3</sub>

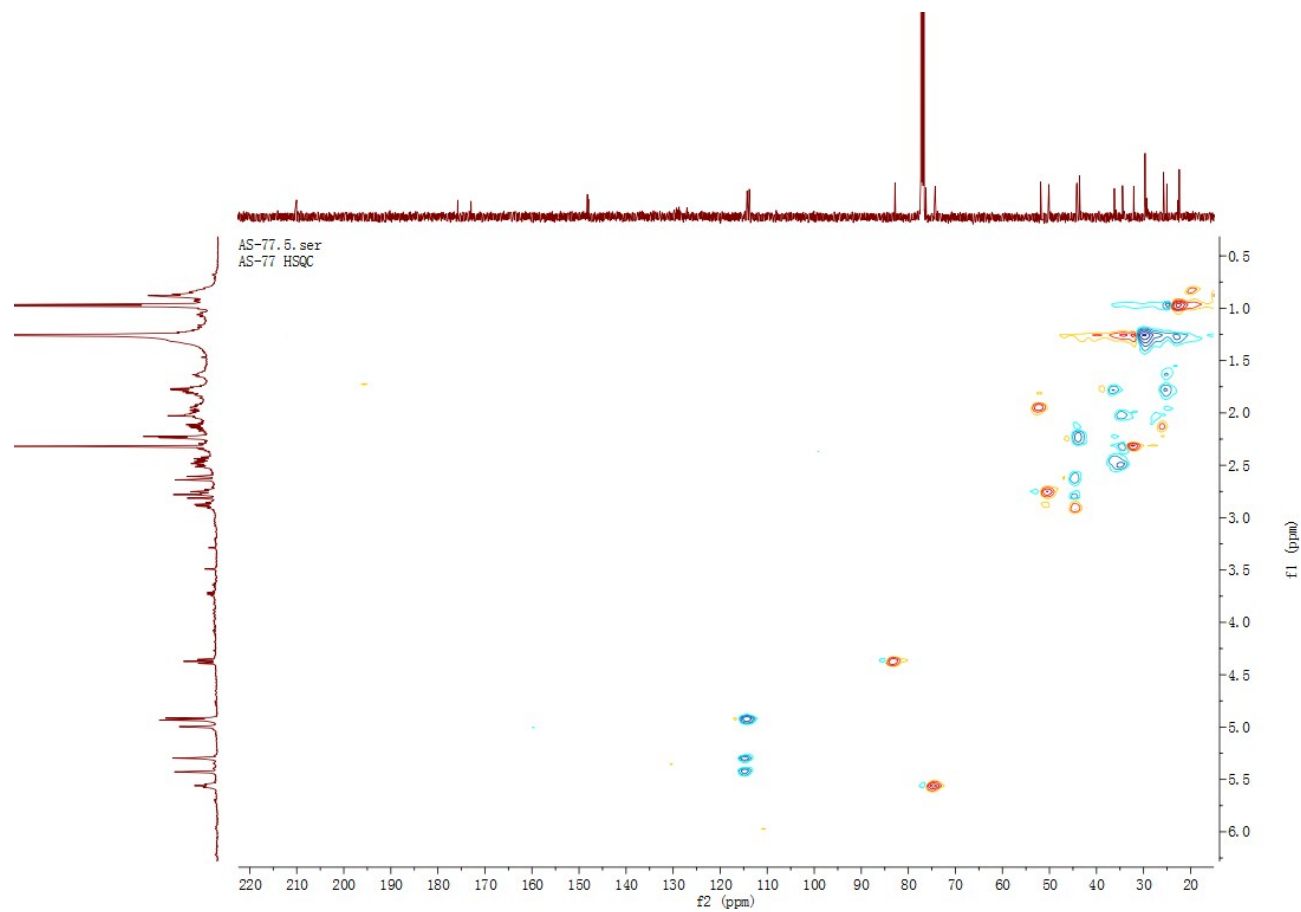

**Figure S33.** HMBC spectrum of Pertyolide C (**3**) in CDCl<sub>3</sub>

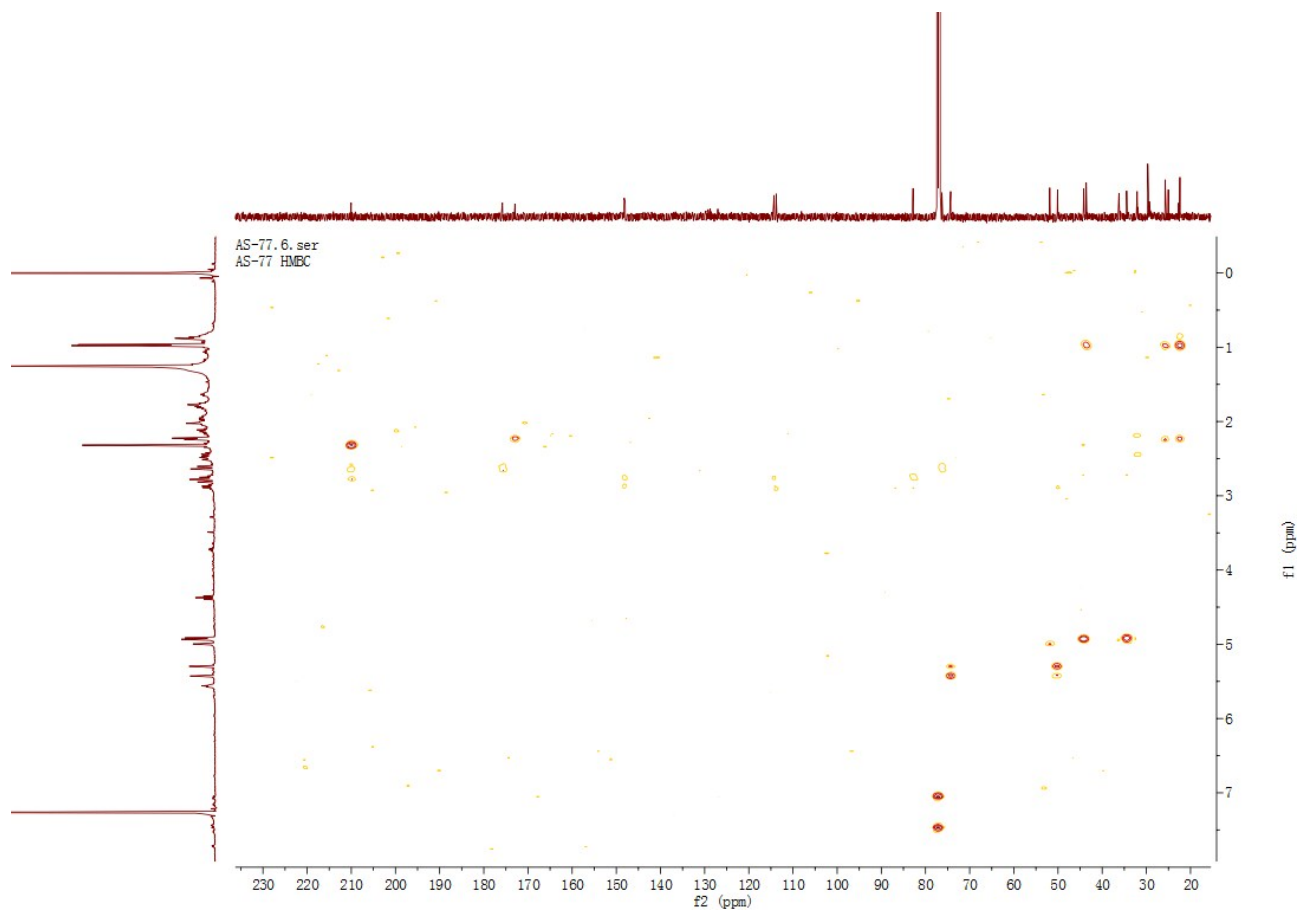

Figure S34. NOESY spectrum of Pertyolide C (**3**) in CDCl<sub>3</sub>

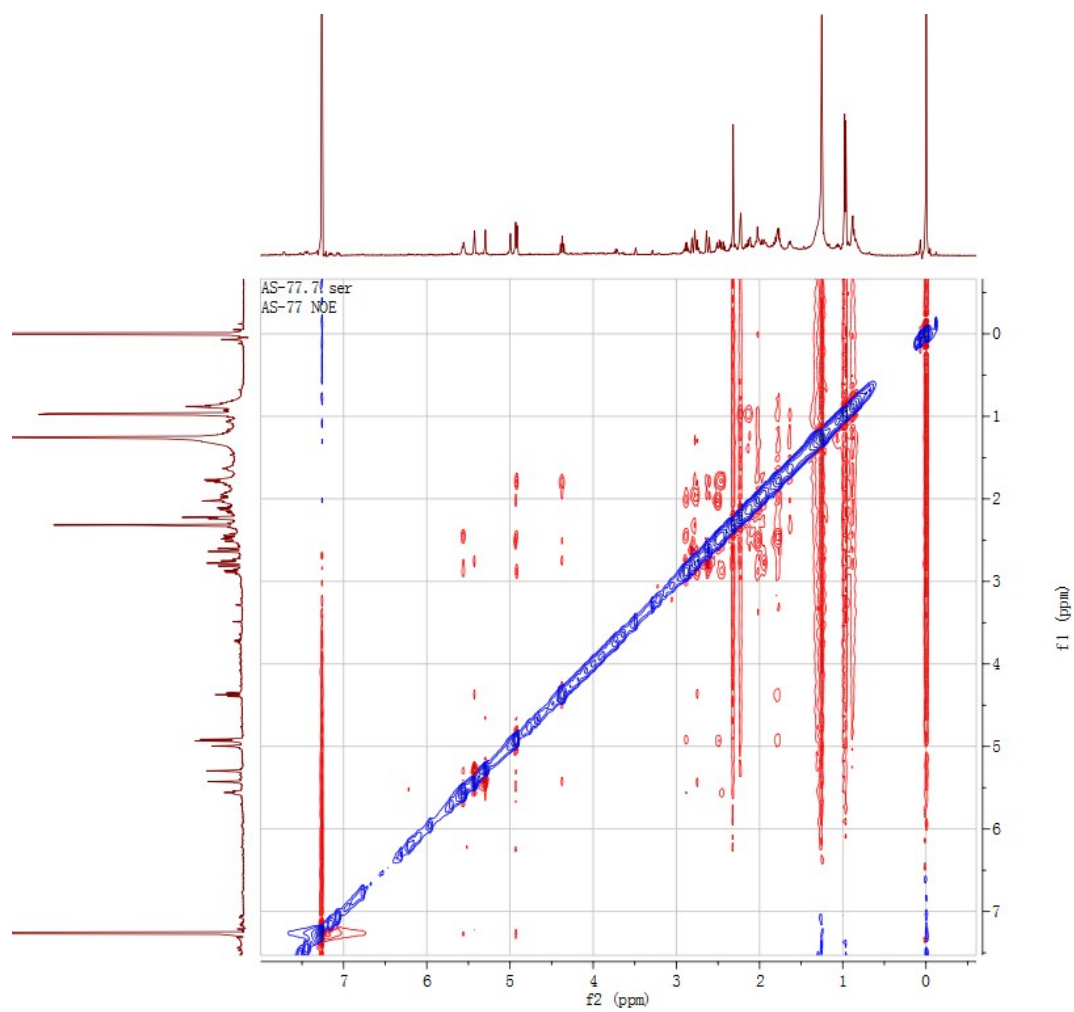

Figure S35. The inhibition rate curves

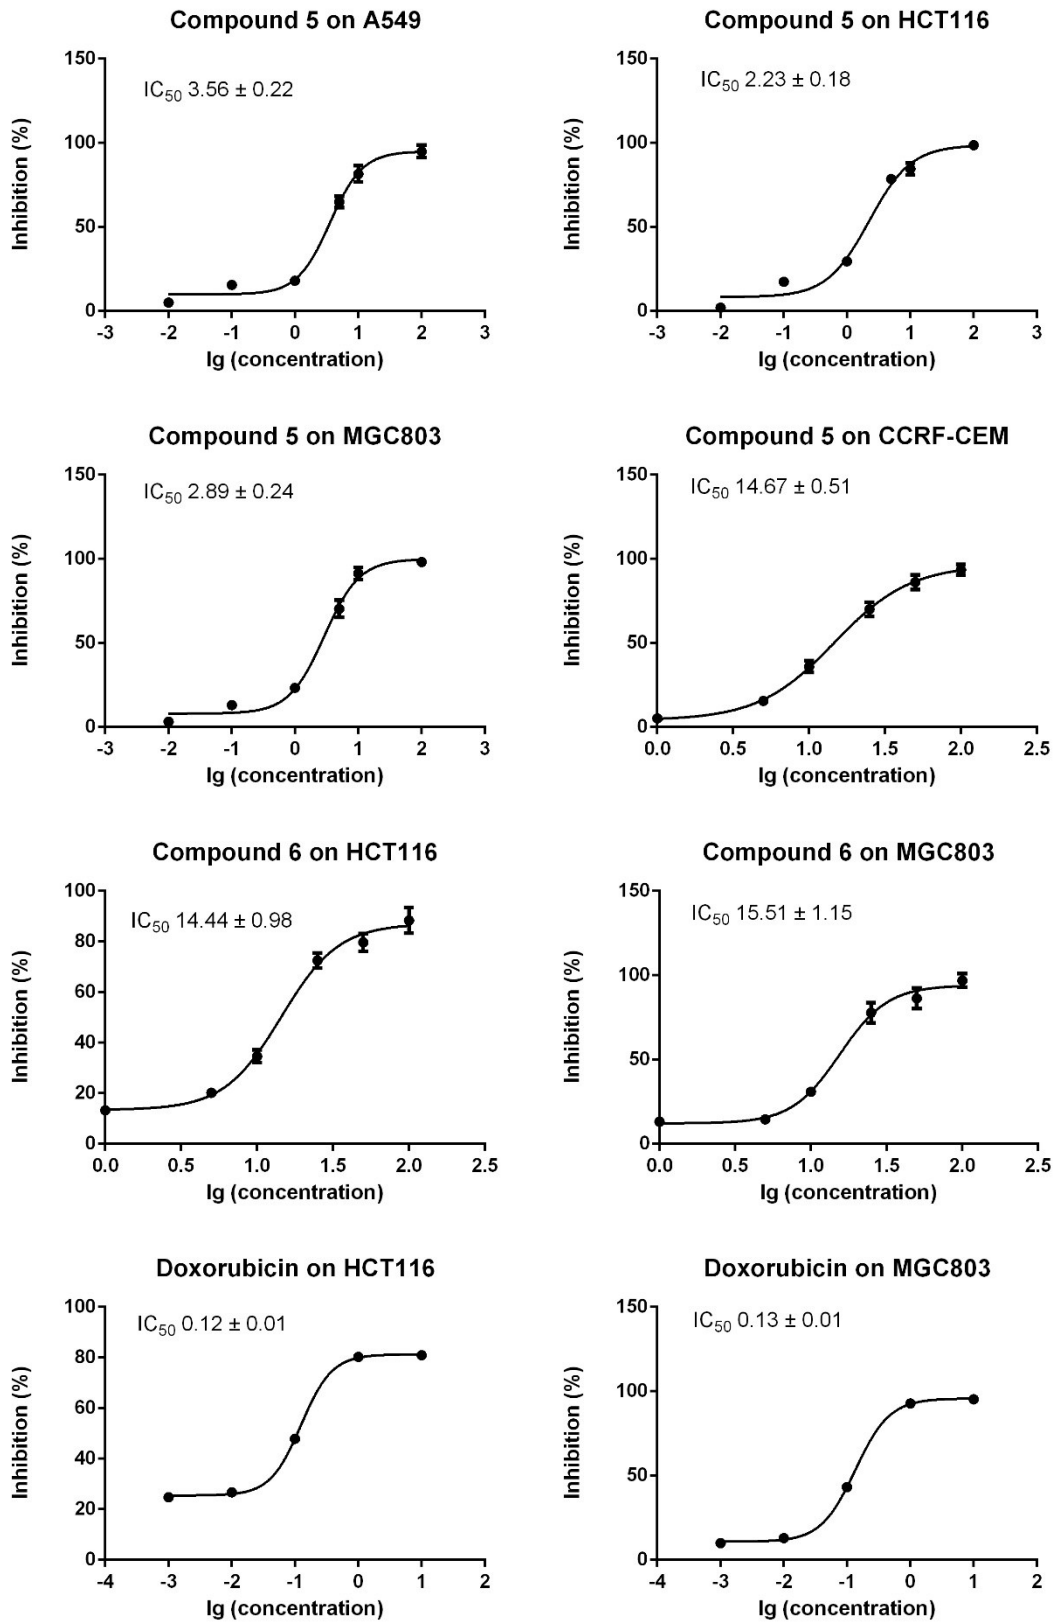

### Doxorubicin on A549

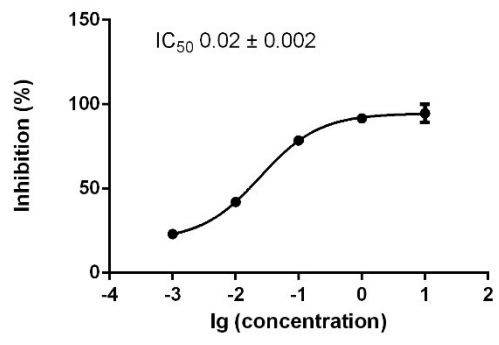



**Table S1–3** Inhibition rate (%) of compounds (**5**, **6**, **Doxorubicin**) against cell lines (Mean  $\pm$  SD, n = 3)

| (μM)   | Compound <b>5</b> |                  |                  |
|--------|-------------------|------------------|------------------|
|        | A549              | HCT116           | MGC803           |
| 100.00 | 94.95 $\pm$ 3.78  | 98.71 $\pm$ 1.91 | 98.20 $\pm$ 1.73 |
| 10.00  | 81.56 $\pm$ 4.84  | 84.57 $\pm$ 3.50 | 91.41 $\pm$ 3.69 |
| 5.00   | 64.98 $\pm$ 3.36  | 78.50 $\pm$ 0.92 | 70.36 $\pm$ 5.14 |
| 1.00   | 18.10 $\pm$ 1.11  | 29.61 $\pm$ 1.87 | 23.35 $\pm$ 2.13 |
| 0.10   | 15.53 $\pm$ 1.42  | 17.43 $\pm$ 1.69 | 13.00 $\pm$ 1.29 |
| 0.01   | 5.00 $\pm$ 0.39   | 2.00 $\pm$ 0.20  | 3.18 $\pm$ 0.24  |

| (μM)   | Compound <b>5</b> | Compound <b>6</b> | Compound <b>6</b> |
|--------|-------------------|-------------------|-------------------|
|        | CCRF-CEM          | HCT116            | MGC803            |
| 100.00 | 93.58 $\pm$ 3.17  | 88.40 $\pm$ 4.15  | 96.97 $\pm$ 4.04  |
| 50.00  | 86.20 $\pm$ 4.41  | 79.68 $\pm$ 3.46  | 86.32 $\pm$ 6.13  |
| 25.00  | 70.10 $\pm$ 4.25  | 72.53 $\pm$ 2.95  | 77.82 $\pm$ 5.97  |
| 10.00  | 35.96 $\pm$ 3.42  | 34.61 $\pm$ 2.50  | 30.99 $\pm$ 1.13  |
| 5.00   | 15.61 $\pm$ 1.40  | 20.17 $\pm$ 1.74  | 14.56 $\pm$ 1.07  |
| 1.00   | 5.21 $\pm$ 0.38   | 13.25 $\pm$ 1.06  | 13.20 $\pm$ 0.93  |

| (μM)  | Doxorubicin      |                  |                  |                  |
|-------|------------------|------------------|------------------|------------------|
|       | A549             | HCT116           | MGC803           | CCRF-CEM         |
| 10    | 94.66 $\pm$ 5.41 | 80.94 $\pm$ 1.13 | 95.32 $\pm$ 1.56 | 99.34 $\pm$ 0.38 |
| 1     | 91.67 $\pm$ 2.71 | 80.25 $\pm$ 0.94 | 92.81 $\pm$ 1.10 | 98.63 $\pm$ 1.79 |
| 0.1   | 78.61 $\pm$ 1.85 | 47.91 $\pm$ 0.44 | 43.16 $\pm$ 2.05 | 98.31 $\pm$ 2.69 |
| 0.01  | 42.10 $\pm$ 0.94 | 26.75 $\pm$ 0.89 | 12.94 $\pm$ 1.21 | 93.26 $\pm$ 1.26 |
| 0.001 | 23.02 $\pm$ 1.85 | 24.80 $\pm$ 0.71 | 9.88 $\pm$ 0.36  | 75.58 $\pm$ 1.79 |
